# Supplementary material for: Inorganic Salts of N-phenylbiguanidium(1+)—Novel Family with Promising Representatives for Nonlinear Optics
Source: MDPI journal article supplement (doi:10.3390/ijms22168419), 2021-08-05
Supplement: s1 [file s1]

# Supplementary Materials

for

## Inorganic salts of *N*-phenylbiguanidium(1+) – novel family with promising representatives for nonlinear optics

Irena Matulková<sup>1</sup>, Ivana Císařová<sup>1</sup>, Michaela Fridrichová<sup>1</sup>, Róbert Gyepes<sup>2</sup>, Petr Němec<sup>3</sup>, Jan Kroupa<sup>4</sup> and Ivan Němec<sup>1,\*</sup>

<sup>1</sup> Department of Inorganic Chemistry, Faculty of Science, Charles University, Hlavova 8, Prague 2, 128 40 (Czech Republic); ivan.nemec@natur.cuni.cz

<sup>2</sup> Department of Molecular Electrochemistry and Catalysis, J. Heyrovský Institute of Physical Chemistry, Czech Academy of Sciences, Dolejškova 3, Prague 8, 182 23 (Czech Republic); robert.gyepes@jh-inst.cas.cz

<sup>3</sup> Department of Chemical Physics and Optics, Faculty of Mathematics and Physics, Charles University, Ke Karlovu 3, Prague 2, 121 16 (Czech Republic); nemec@karlov.mff.cuni.cz

<sup>4</sup> Department of Dielectrics, Institute of Physics, Czech Academy of Sciences, Na Slovance 2, Prague 8, 182 21 (Czech Republic); kroupa@fzu.cz

\* Correspondence: ivan.nemec@natur.cuni.cz; Tel.: +420 221 951 247

**Table S1.** Basic crystallographic data and structure refinement details for **phbiguaNO<sub>3</sub>**, **phbiguaClO<sub>4</sub>**, **phbigua<sub>2</sub>HPO<sub>4</sub>1.5H<sub>2</sub>O**, and **phbigua<sub>2</sub>HPO<sub>3</sub>2H<sub>2</sub>O**.

| Identification code                                        | <b>phbiguaNO<sub>3</sub></b>                                         | <b>phbiguaClO<sub>4</sub></b>                                   | <b>phbigua<sub>2</sub>HPO<sub>4</sub>1.5H<sub>2</sub>O</b>         | <b>phbigua<sub>2</sub>HPO<sub>3</sub>2H<sub>2</sub>O</b>         |
|------------------------------------------------------------|----------------------------------------------------------------------|-----------------------------------------------------------------|--------------------------------------------------------------------|------------------------------------------------------------------|
| Empirical formula                                          | C <sub>8</sub> H <sub>12</sub> N <sub>6</sub> O <sub>3</sub>         | C <sub>8</sub> H <sub>12</sub> Cl N <sub>5</sub> O <sub>4</sub> | C <sub>16</sub> H <sub>28</sub> N <sub>10</sub> O <sub>5.5</sub> P | C <sub>16</sub> H <sub>29</sub> N <sub>10</sub> O <sub>5</sub> P |
| Formula weight                                             | 240.24                                                               | 277.68                                                          | 479.45                                                             | 472.46                                                           |
| Temperature                                                | 293(2) K                                                             | 293(2) K                                                        | 150(2) K                                                           | 150(2) K                                                         |
| <i>a</i>                                                   | 18.9690(5) Å                                                         | 7.4100(3) Å                                                     | 14.7620(2) Å                                                       | 16.483(5) Å                                                      |
| <i>b</i>                                                   | 6.1080(2) Å                                                          | 9.1199(3) Å                                                     | 17.4790(5) Å                                                       | 7.8587(12) Å                                                     |
| <i>c</i>                                                   | 20.3420(7) Å                                                         | 9.7919(5) Å                                                     | 18.6460(6) Å                                                       | 17.125(3) Å                                                      |
| $\alpha$                                                   | 90 °                                                                 | 97.990(3) °                                                     | 91.1430(11) °                                                      | 90 °                                                             |
| $\beta$                                                    | 98.8700(17) °                                                        | 110.418(2) °                                                    | 90.1300(19) °                                                      | 92.797(17) °                                                     |
| $\gamma$                                                   | 90 °                                                                 | 96.388(3) °                                                     | 114.5310(15) °                                                     | 90 °                                                             |
| Volume                                                     | 2328.69(13) Å <sup>3</sup>                                           | 604.96(4) Å <sup>3</sup>                                        | 4375.7(2) Å <sup>3</sup>                                           | 2215.6(8) Å <sup>3</sup>                                         |
| <i>Z</i>                                                   | 8                                                                    | 2                                                               | 8                                                                  | 4                                                                |
| Calculated density                                         | 1.370 Mg/m <sup>3</sup>                                              | 1.524 Mg/m <sup>3</sup>                                         | 1.456 Mg/m <sup>3</sup>                                            | 1.416 Mg/m <sup>3</sup>                                          |
| Crystal system                                             | Monoclinic                                                           | Triclinic                                                       | Triclinic                                                          | Monoclinic                                                       |
| Space group                                                | <i>C</i> 2/ <i>c</i>                                                 | <i>P</i> -1                                                     | <i>P</i> -1                                                        | <i>P</i> 2 <sub>1</sub> / <i>n</i>                               |
| Absorption coefficient                                     | 0.108 mm <sup>-1</sup>                                               | 0.332 mm <sup>-1</sup>                                          | 0.180 mm <sup>-1</sup>                                             | 0.175 mm <sup>-1</sup>                                           |
| <i>F</i> (000)                                             | 1008                                                                 | 288                                                             | 2024                                                               | 1000                                                             |
| Crystal size                                               | 0.35 x 0.27 x 0.12 mm                                                | 0.5 x 0.2 x 0.15 mm                                             | 0.5 x 0.27 x 0.175 mm                                              | 0.329 x 0.22 x 0.12 mm                                           |
| Diffraction and radiation                                  | Nonius Kappa CCD, Mo $\lambda$ = 0.71073 Å                           |                                                                 |                                                                    |                                                                  |
| Scan technique                                             | $\omega$ and $\varphi$ scans to fill the Ewald sphere                |                                                                 |                                                                    |                                                                  |
| Completeness to $\theta$                                   | 99.30%                                                               | 99.30%                                                          | 97.70 %                                                            | 99.90%                                                           |
| Range of <i>h</i> , <i>k</i> and <i>l</i>                  | -23 $\rightarrow$ 24, -7 $\rightarrow$ 7, -26 $\rightarrow$ 26       | -9 $\rightarrow$ 9, -11 $\rightarrow$ 11, -12 $\rightarrow$ 11  | -19 $\rightarrow$ 19, -22 $\rightarrow$ 22, -24 $\rightarrow$ 24   | -20 $\rightarrow$ 20, -9 $\rightarrow$ 9, -21 $\rightarrow$ 21   |
| $\theta$ range for data collection                         | 3.51 to 27.50 °                                                      | 2.89 to 27.47 °                                                 | 1.28 to 27.49 °                                                    | 3 to 26.5 °                                                      |
| Reflection collected/unique ( <i>R</i> <sub>int</sub> )    | 22761 / 2648 (0.0209)                                                | 7394 / 2763 (0.0332)                                            | 62854 / 19632 (0.0531)                                             | 28790 / 4630 (0.0273)                                            |
| No. of observed reflection                                 | 2054                                                                 | 2203                                                            | 14602                                                              | 3766                                                             |
| Criterion for observed reflection                          | <i>I</i> > 2 $\sigma$ ( <i>I</i> )                                   |                                                                 |                                                                    |                                                                  |
| Absorption correction                                      | none                                                                 |                                                                 |                                                                    |                                                                  |
| Function minimized                                         | $\Sigma w(F_o^2 - F_c^2)^2$                                          |                                                                 |                                                                    |                                                                  |
| Parameters refined                                         | 154                                                                  | 164                                                             | 1175                                                               | 293                                                              |
| <i>R</i> ; <i>wR</i> [ <i>I</i> > 2 $\sigma$ ( <i>I</i> )] | 0.0473; 0.1210                                                       | 0.0822; 0.2379                                                  | 0.0474; 0.1080                                                     | 0.0308; 0.0909                                                   |
| <i>R</i> ; <i>wR</i> (all data)                            | 0.0616; 0.1317                                                       | 0.0963; 0.2560                                                  | 0.0769; 0.1224                                                     | 0.0385; 0.0935                                                   |
| Value of <i>S</i>                                          | 1.054                                                                | 1.087                                                           | 1.037                                                              | 1.120                                                            |
| Max and min. heights in final $\Delta\rho$ map             | 0.173 and -0.190 e.Å <sup>-3</sup>                                   | 1.130 and -0.697 e.Å <sup>-3</sup>                              | 0.506 and -0.462 e.Å <sup>-3</sup>                                 | 0.437 and -0.340 e.Å <sup>-3</sup>                               |
| Weighting scheme                                           | $w = [\sigma^2(F_o^2) + aP^2 + bP]^{-1}$<br>$P = (F_o^2 + 2F_c^2)/3$ |                                                                 |                                                                    |                                                                  |
|                                                            | <i>a</i> = 0.0608                                                    | <i>a</i> = 0.1481                                               | <i>a</i> = 0.0491                                                  | <i>a</i> = 0.0560                                                |
|                                                            | <i>b</i> = 0.9527                                                    | <i>b</i> = 0.5740                                               | <i>b</i> = 2.6699                                                  | <i>b</i> = 0.2924                                                |

**Table S2.** Basic crystallographic data and structure refinement details for **phbigua<sub>2</sub>HPO<sub>3</sub>**, **phbigua<sub>2</sub>SO<sub>4</sub>** and **phbiguaHCO<sub>3</sub>**.

| Identification code                                         | phbigua <sub>2</sub> HPO <sub>3</sub>                                                                                     | phbigua <sub>2</sub> SO <sub>4</sub>                             | phbiguaHCO <sub>3</sub>                                      |
|-------------------------------------------------------------|---------------------------------------------------------------------------------------------------------------------------|------------------------------------------------------------------|--------------------------------------------------------------|
| Empirical formula                                           | C <sub>16</sub> H <sub>25</sub> N <sub>10</sub> O <sub>3</sub> P                                                          | C <sub>16</sub> H <sub>24</sub> N <sub>10</sub> O <sub>4</sub> S | C <sub>9</sub> H <sub>13</sub> N <sub>5</sub> O <sub>3</sub> |
| Formula weight                                              | 436.43                                                                                                                    | 452.51                                                           | 239.24                                                       |
| Temperature                                                 | 150(2) K                                                                                                                  | 293(2) K                                                         | 150(2) K                                                     |
| <i>a</i>                                                    | 6.3624(2) Å                                                                                                               | 17.6320(6) Å                                                     | 9.9638(3) Å                                                  |
| <i>b</i>                                                    | 17.4832(6) Å                                                                                                              | 6.5130(2) Å                                                      | 7.1842(2) Å                                                  |
| <i>c</i>                                                    | 9.8646(3) Å                                                                                                               | 10.7200(5) Å                                                     | 16.1301(5) Å                                                 |
| $\alpha$                                                    | 90 °                                                                                                                      | 90 °                                                             | 90 °                                                         |
| $\beta$                                                     | 108.1890(10) °                                                                                                            | 118.7061(16) °                                                   | 94.5525(16) °                                                |
| $\gamma$                                                    | 90 °                                                                                                                      | 90 °                                                             | 90 °                                                         |
| Volume                                                      | 1042.46(6) Å <sup>3</sup>                                                                                                 | 1079.75(7) Å <sup>3</sup>                                        | 1150.98(6) Å <sup>3</sup>                                    |
| <i>Z</i>                                                    | 2                                                                                                                         | 2                                                                | 4                                                            |
| Calculated density                                          | 1.390 Mg/m <sup>3</sup>                                                                                                   | 1.392 Mg/m <sup>3</sup>                                          | 1.381 Mg/m <sup>3</sup>                                      |
| Crystal system                                              | Monoclinic                                                                                                                | Monoclinic                                                       | Monoclinic                                                   |
| Space group                                                 | <i>P</i> 2 <sub>1</sub>                                                                                                   | <i>C</i> 2                                                       | <i>P</i> 2 <sub>1</sub> / <i>c</i>                           |
| Absorption coefficient                                      | 0.173 mm <sup>-1</sup>                                                                                                    | 0.196 mm <sup>-1</sup>                                           | 0.107 mm <sup>-1</sup>                                       |
| <i>F</i> (000)                                              | 460                                                                                                                       | 476                                                              | 504                                                          |
| Crystal size                                                | 0.325 x 0.273 x 0.174 mm                                                                                                  | 0.5 x 0.3 x 0.27 mm                                              | 0.4 x 0.4 x 0.3 mm                                           |
| Diffractionmeter and radiation                              | Bruker D8 VENTURE<br>Kappa Duo PHOTON III<br>CMOS, Mo $\lambda$ = 0.71073 Å<br>Nonius Kappa CCD, Mo $\lambda$ = 0.71073 Å |                                                                  |                                                              |
| Scan technique                                              | $\omega$ and $\varphi$ scans to fill the Ewald sphere                                                                     |                                                                  |                                                              |
| Completeness to $\theta$                                    | 99.20%                                                                                                                    | 98.20 %                                                          | 99.80 %                                                      |
| Range of <i>h</i> , <i>k</i> and <i>l</i>                   | -8 → 8, -22 → 22, -10 → 12                                                                                                | -22 → 22, -8 → 8, -13 → 13                                       | -12 → 12, -9 → 9, -20 → 20                                   |
| $\theta$ range for data collection                          | 2.330 to 27.502 °                                                                                                         | 4.34 to 27.45 °                                                  | 2.050 to 27.50 °                                             |
| Reflection collected/unique ( <i>R</i> <sub>int</sub> )     | 13672 / 4723 (0.0299)                                                                                                     | 7017 / 2443 (0.0230)                                             | 14499 / 2632 (0.0269)                                        |
| No. of observed reflection                                  | 4675                                                                                                                      | 2378                                                             | 2118                                                         |
| Criterion for observed reflection                           | <i>I</i> > 2 $\sigma$ ( <i>I</i> )                                                                                        |                                                                  |                                                              |
| Absorption correction                                       | multi-scan                                                                                                                | none                                                             |                                                              |
| Function minimized                                          | $\sum w(F_o^2 - F_c^2)^2$                                                                                                 |                                                                  |                                                              |
| Parameters refined                                          | 274                                                                                                                       | 141                                                              | 154                                                          |
| <i>R</i> ; <i>wR</i> [ <i>I</i> > 2 <i>s</i> ( <i>I</i> ) ] | 0.0254; 0.0666                                                                                                            | 0.0370; 0.1020                                                   | 0.0498; 0.1087                                               |
| <i>R</i> ; <i>wR</i> (all data)                             | 0.0256; 0.0670                                                                                                            | 0.0382; 0.1038                                                   | 0.0385; 0.1018                                               |
| Value of <i>S</i>                                           | 1.043                                                                                                                     | 1.060                                                            | 1.081                                                        |
| Max and min. heights in final $\Delta\rho$ map              | 0.210 and -0.195 e.Å <sup>-3</sup>                                                                                        | 0.249 and -0.274 e.Å <sup>-3</sup>                               | 0.210 and -0.236 e.Å <sup>-3</sup>                           |
| Weighting scheme                                            | $w = [\sigma^2(F_o^2) + aP^2 + bP]^{-1}$<br>$P = (F_o^2 + 2F_c^2)/3$                                                      |                                                                  |                                                              |
|                                                             | <i>a</i> = 0.0392<br><i>b</i> = 0.1575                                                                                    | <i>a</i> = 0.0619<br><i>b</i> = 0.3414                           | <i>a</i> = 0.0647<br><i>b</i> = 0.0986                       |

**Table S3.** Selected bond lengths [ $\text{\AA}$ ] and angles [ $^\circ$ ] for **phbiguaNO<sub>3</sub>**.

| Bond/Angle                 | Value (Å/°) | Angle        | Value (°)  |        |
|----------------------------|-------------|--------------|------------|--------|
| N1 - C1                    | 1.3501(18)  | N3 - C1 - N2 | 125.48(13) |        |
| N1 - C3                    | 1.4112(19)  | N3 - C1 - N1 | 119.19(13) |        |
| N2 - C1                    | 1.3311(19)  | N2 - C1 - N1 | 115.25(12) |        |
| N3 - C1                    | 1.3239(18)  | N4 - C2 - N5 | 117.88(14) |        |
| N3 - C2                    | 1.3333(18)  | N4 - C2 - N3 | 117.57(14) |        |
| N4 - C2                    | 1.3269(19)  | N5 - C2 - N3 | 124.43(13) |        |
| N5 - C2                    | 1.331(2)    | C8 - C3 - C4 | 119.69(16) |        |
| C3 - C8                    | 1.384(2)    | C8 - C3 - N1 | 116.93(14) |        |
| C3 - C4                    | 1.386(2)    | C4 - C3 - N1 | 123.32(15) |        |
| C4 - C5                    | 1.388(3)    | C3 - C4 - C5 | 118.61(19) |        |
| C5 - C6                    | 1.376(4)    | C6 - C5 - C4 | 121.4(2)   |        |
| C6 - C7                    | 1.368(4)    | C7 - C6 - C5 | 119.66(19) |        |
| C7 - C8                    | 1.380(3)    | C6 - C7 - C8 | 119.9(2)   |        |
| N6 - O1                    | 1.2335(16)  | C7 - C8 - C3 | 120.74(18) |        |
| N6 - O2                    | 1.2408(16)  | O1 - N6 - O2 | 120.05(12) |        |
| N6 - O3                    | 1.2406(16)  | O1 - N6 - O3 | 119.37(13) |        |
| C1 - N1 - C3               | 128.23(12)  | O2 - N6 - O3 | 120.57(12) |        |
| C1 - N3 - C2               | 121.84(13)  |              |            |        |
| Hydrogen bonds             |             |              |            |        |
| D-H...A                    | d(D-H)      | d(H...A)     | d(D...A)   | <(DHA) |
| N1 - H1...O2 <sup>a</sup>  | 0.929       | 2.04         | 2.9627(17) | 173    |
| N2 - H2A...O3 <sup>b</sup> | 0.8755      | 2.18         | 2.9469(19) | 145    |
| N2 - H2A...N5              | 0.8755      | 2.52         | 2.8888(18) | 107    |
| N2 - H2B...O3 <sup>a</sup> | 0.9246      | 2.01         | 2.9063(16) | 164    |
| N4 - H4A...O2 <sup>c</sup> | 0.925       | 2.11         | 3.0314(17) | 171    |
| N4 - H4B...O1 <sup>d</sup> | 0.9636      | 1.97         | 2.9263(17) | 175    |
| N5 - H5A...N2              | 0.9002      | 2.46         | 2.8888(18) | 110    |
| N5 - H5B...O1 <sup>c</sup> | 0.8979      | 2.01         | 2.8927(18) | 166    |
| C4 - H4...N3               | 0.9300      | 2.48         | 2.922(2)   | 109    |

*Note.* Equivalent positions: (a)  $1/2-x, 3/2-y, -z$ ; (b)  $x, 1+y, z$ ; (c)  $1-x, 2-y, -z$ ; (d)  $1-x, 1-y, -z$

**Table S4.** Selected bond lengths [ $\text{\AA}$ ] and angles [ $^\circ$ ] for **phbiguaClO<sub>4</sub>**.

| Bond/Angle                 | Value (Å/°) | Angle          | Value (°) |        |
|----------------------------|-------------|----------------|-----------|--------|
| C1 - N2                    | 1.329(4)    | N5 - C2 - N3   | 118.0(3)  |        |
| C1 - N3                    | 1.333(4)    | N4 - C2 - N3   | 123.4(3)  |        |
| C1 - N1                    | 1.336(4)    | C8 - C3 - C4   | 120.4(3)  |        |
| C2 - N5                    | 1.321(4)    | C8 - C3 - N1   | 119.6(3)  |        |
| C2 - N4                    | 1.332(5)    | C4 - C3 - N1   | 120.0(3)  |        |
| C2 - N3                    | 1.343(4)    | C3 - C4 - C5   | 119.3(4)  |        |
| C3 - C8                    | 1.376(6)    | C6 - C5 - C4   | 120.5(4)  |        |
| C3 - C4                    | 1.388(5)    | C5 - C6 - C7   | 119.8(4)  |        |
| C3 - N1                    | 1.431(4)    | C6 - C7 - C8   | 120.6(4)  |        |
| C4 - C5                    | 1.388(5)    | C3 - C8 - C7   | 119.4(4)  |        |
| C5 - C6                    | 1.366(6)    | C1 - N1 - H1   | 117.8     |        |
| C6 - C7                    | 1.379(7)    | C3 - N1 - H1   | 116.2     |        |
| C7 - C8                    | 1.385(6)    | C1 - N2 - H2A  | 118.0     |        |
| N1 - H1                    | 0.8881      | C1 - N2 - H2B  | 121.5     |        |
| N2 - H2A                   | 0.8988      | H2A - N2 - H2B | 118.9     |        |
| N2 - H2B                   | 0.9341      | C1 - N3 - C2   | 122.3(3)  |        |
| N4 - H4A                   | 0.9137      | C2 - N4 - H4A  | 114.4     |        |
| N4 - H4B                   | 0.9712      | C2 - N4 - H4B  | 117.2     |        |
| N5 - H5A                   | 0.9056      | H4A - N4 - H4B | 127.8     |        |
| N5 - H5B                   | 0.9666      | C2 - N5 - H5A  | 121.6     |        |
| Cl1 - O1                   | 1.322(5)    | C2 - N5 - H5B  | 121.2     |        |
| Cl1 - O2                   | 1.397(4)    | H5A - N5 - H5B | 115.3     |        |
| Cl1 - O3                   | 1.400(4)    | O1 - Cl1 - O2  | 114.2(4)  |        |
| Cl1 - O4                   | 1.407(6)    | O1 - Cl1 - O3  | 110.3(5)  |        |
| N2 - C1 - N3               | 124.8(3)    | O2 - Cl1 - O3  | 114.5(3)  |        |
| N2 - C1 - N1               | 118.3(3)    | O1 - Cl1 - O4  | 106.2(7)  |        |
| N3 - C1 - N1               | 116.8(3)    | O2 - Cl1 - O4  | 109.0(3)  |        |
| N5 - C2 - N4               | 118.5(3)    | O3 - Cl1 - O4  | 101.5(4)  |        |
| Hydrogen bonds             |             |                |           |        |
| D-H...A                    | d(D-H)      | d(H...A)       | d(D...A)  | <(DHA) |
| N2 - H2A...O1              | 0.90        | 2.01           | 2.850(6)  | 156    |
| N2 - H2B...O3 <sup>a</sup> | 0.93        | 2.45           | 3.079(6)  | 125    |
| N2 - H2B...O4 <sup>a</sup> | 0.93        | 2.46           | 3.181(6)  | 135    |
| N2 - H2A...N4              | 0.90        | 2.55           | 2.918(5)  | 105    |
| N4 - H4A...O3 <sup>l</sup> | 0.91        | 2.14           | 3.046(6)  | 169    |
| N4 - H4B...O2 <sup>c</sup> | 0.97        | 1.99           | 2.962(6)  | 179    |
| N4 - H4A...N2              | 0.91        | 2.57           | 2.918(5)  | 103    |
| N5 - H5A...O4 <sup>c</sup> | 0.91        | 2.14           | 3.025(6)  | 166    |
| N5 - H5B...N3 <sup>d</sup> | 0.97        | 2.04           | 3.006(4)  | 176    |

Note. Equivalent positions: (a) 1-x, -y, 1-z; (b) -1+x, y, z; (c) 1-x, 1-y, 1-z; (d) 1-x, 1-y, 2-z

**Table S5.** Selected bond lengths [Å] and angles [°] for **phbiguaHCO<sub>3</sub>**.

| Bond/Angle                 | Value (Å/°) | Angle         | Value (°)  |        |
|----------------------------|-------------|---------------|------------|--------|
| N1 - C1                    | 1.3473(14)  | N2 - C1 - N3  | 124.39(10) |        |
| N1 - C3                    | 1.4133(14)  | N2 - C1 - N1  | 114.76(10) |        |
| N2 - C1                    | 1.3369(15)  | N3 - C1 - N1  | 120.71(10) |        |
| N3 - C1                    | 1.3409(14)  | N5 - C2 - N4  | 118.29(10) |        |
| N3 - C2                    | 1.3605(14)  | N5 - C2 - N3  | 117.85(10) |        |
| N4 - C2                    | 1.3287(14)  | N4 - C2 - N3  | 123.74(10) |        |
| N5 - C2                    | 1.3206(15)  | C4 - C3 - C8  | 119.44(11) |        |
| C3 - C4                    | 1.3932(17)  | C4 - C3 - N1  | 124.32(10) |        |
| C3 - C8                    | 1.3950(17)  | C8 - C3 - N1  | 116.13(10) |        |
| C4 - C5                    | 1.3896(18)  | C5 - C4 - C3  | 119.27(11) |        |
| C5 - C6                    | 1.382(2)    | C6 - C5 - C4  | 121.26(13) |        |
| C6 - C7                    | 1.381(2)    | C7 - C6 - C5  | 119.56(12) |        |
| C7 - C8                    | 1.3901(17)  | C6 - C7 - C8  | 120.04(12) |        |
| C9 - O3                    | 1.2421(13)  | C7 - C8 - C3  | 120.43(12) |        |
| C9 - O2                    | 1.2607(13)  | O3 - C9 - O2  | 126.30(10) |        |
| C9 - O1                    | 1.3521(13)  | O3 - C9 - O1  | 115.77(10) |        |
| C1 - N1 - C3               | 130.32(10)  | O2 - C9 - O1  | 117.91(9)  |        |
| C1 - N3 - C2               | 119.86(9)   | C9 - O1 - H1O | 113.8      |        |
| Hydrogen bonds             |             |               |            |        |
| D-H...A                    | d(D-H)      | d(H...A)      | d(D...A)   | <(DHA) |
| O1 - H1O...N3 <sup>a</sup> | 0.8991      | 1.91          | 2.7943(12) | 168    |
| N1 - H1...O2               | 0.9413      | 1.94          | 2.8782(13) | 174    |
| N2 - H2A...N4              | 0.9166      | 2.50          | 2.8487(14) | 103    |
| N2 - H2A...O2 <sup>b</sup> | 0.9166      | 2.00          | 2.8728(13) | 160    |
| N2 - H2B...O3              | 0.9359      | 1.88          | 2.8062(13) | 169    |
| N4 - H4A...O1 <sup>c</sup> | 0.9121      | 1.92          | 2.8273(13) | 173    |
| N4 - H4B...N2              | 0.9458      | 2.47          | 2.8487(14) | 104    |
| N5 - H5A...O2 <sup>d</sup> | 0.9544      | 1.89          | 2.8317(12) | 167    |
| N5 - H5B...O3 <sup>c</sup> | 0.9284      | 1.94          | 2.8572(12) | 170    |
| C4 - H4...N3               | 0.9500      | 2.49          | 3.0147(16) | 115    |

*Note.* Equivalent positions: (a) x, 1/2-y, 1/2+z; (b) x, -1/2-y, -1/2+z; (c) x, 1/2-y, -1/2+z; (d) 1-x, -1/2+y, 1/2-z

**Table S6.** Selected bond lengths [Å] and angles [°] for **phbigua<sub>2</sub>SO<sub>4</sub>**.

| Bond/Angle                 | Value (Å/°) | Angle                                  | Value (°)  |        |
|----------------------------|-------------|----------------------------------------|------------|--------|
| N1 - C1                    | 1.347(3)    | N3 - C1 - N1                           | 119.0(2)   |        |
| N1 - C3                    | 1.420(3)    | N2 - C1 - N1                           | 115.67(19) |        |
| N2 - C1                    | 1.338(3)    | N4 - C2 - N5                           | 119.2(2)   |        |
| N3 - C1                    | 1.316(3)    | N4 - C2 - N3                           | 122.9(2)   |        |
| N3 - C2                    | 1.346(3)    | N5 - C2 - N3                           | 117.9(2)   |        |
| N4 - C2                    | 1.335(4)    | C3 - C4 - C5                           | 119.7(3)   |        |
| N4 - H4B                   | 0.9592      | C4 - C3 - N1                           | 118.0(3)   |        |
| N5 - C2                    | 1.322(3)    | C6 - C5 - C4                           | 119.6(4)   |        |
| C3 - C4                    | 1.370(4)    | C6 - C7 - C8                           | 121.0(4)   |        |
| C3 - C8                    | 1.384(4)    | C7 - C6 - C5                           | 120.2(4)   |        |
| C4 - C5                    | 1.414(5)    | C7 - C8 - C3                           | 119.6(4)   |        |
| C5 - C6                    | 1.369(7)    | C8 - C3 - C4                           | 119.9(3)   |        |
| C6 - C7                    | 1.358(8)    | C8 - C3 - N1                           | 122.0(3)   |        |
| C7 - C8                    | 1.384(5)    | O1 <sup>d</sup> - S1 - O1              | 113.3(2)   |        |
| S1 - O1                    | 1.460(2)    | O1 <sup>d</sup> - S1 - O2 <sup>d</sup> | 109.42(11) |        |
| S1 - O2                    | 1.4704(19)  | O1 - S1 - O2 <sup>d</sup>              | 109.12(17) |        |
| C1 - N1 - C3               | 126.56(19)  | O1 <sup>d</sup> - S1 - O2              | 109.13(17) |        |
| C1 - N3 - C2               | 121.8(2)    | O1 - S1 - O2                           | 108.41(11) |        |
| N3 - C1 - N2               | 125.1(2)    | O2 <sup>d</sup> - S1 - O2              | 108.35(17) |        |
| Hydrogen bonds             |             |                                        |            |        |
| D-H...A                    | d(D-H)      | d(H...A)                               | d(D...A)   | <(DHA) |
| N1 - H1...O2               | 0.9802      | 1.84                                   | 2.813(2)   | 170    |
| N2 - H2A...N4              | 0.9769      | 2.53                                   | 2.926(4)   | 104    |
| N2 - H2B...O1              | 0.9181      | 1.93                                   | 2.852(2)   | 176    |
| N4 - H4A...O1 <sup>a</sup> | 0.8824      | 2.29                                   | 3.066(4)   | 147    |
| N5 - H5A...O1 <sup>b</sup> | 0.9344      | 2.02                                   | 2.849(4)   | 146    |
| N5 - H5B...O2 <sup>c</sup> | 0.9737      | 1.89                                   | 2.857(2)   | 171    |
| C8 - H8...N3               | 0.9300      | 2.45                                   | 2.882(4)   | 108    |

*Note.* Equivalent positions: (a) 3/2-x, 1/2+y, -z; (b) 3/2-x, -1/2+y, -z; (c) 1/2+x, 1/2+y, z; (d) 1-x, y, -z

**Table S7.** Selected bond lengths [Å] and angles [°] for **phbigua<sub>2</sub>HPO<sub>4</sub>·1.5H<sub>2</sub>O**.

| Bond      | Value (Å) | Bond      | Value (Å) | Bond      | Value (Å) | Bond/Angle      | Value (Å/°) | Angle           | Value (°) | Angle           | Value (°) | Angle           | Value (°) |
|-----------|-----------|-----------|-----------|-----------|-----------|-----------------|-------------|-----------------|-----------|-----------------|-----------|-----------------|-----------|
| N11 - C11 | 1.355(3)  | N41 - C41 | 1.348(2)  | N71 - C71 | 1.342(3)  | P41 - O43       | 1.524(2)    | N32 - C31 - N31 | 115.9(2)  | C54 - C53 - N51 | 122.8(2)  | C81 - N83 - C82 | 122.1(2)  |
| N11 - C13 | 1.420(3)  | N41 - C43 | 1.418(3)  | N71 - C73 | 1.422(3)  | P41 - O41       | 1.525(2)    | N33 - C31 - N31 | 118.6(2)  | C55 - C54 - C53 | 120.1(2)  | N83 - C81 - N82 | 125.4(2)  |
| N12 - C11 | 1.324(3)  | N42 - C41 | 1.335(3)  | N72 - C71 | 1.342(3)  | P41 - O44       | 1.583(2)    | N34 - C32 - N33 | 117.7(2)  | C54 - C55 - C56 | 120.7(2)  | N83 - C81 - N81 | 119.1(2)  |
| N13 - C11 | 1.334(3)  | N43 - C41 | 1.333(3)  | N73 - C71 | 1.336(3)  |                 |             | N34 - C32 - N35 | 117.5(2)  | C57 - C56 - C55 | 119.2(2)  | N82 - C81 - N81 | 115.4(2)  |
| N13 - C12 | 1.342(3)  | N43 - C42 | 1.342(3)  | N73 - C72 | 1.343(3)  | C11 - N11 - C13 | 127.7(2)    | N33 - C32 - N35 | 124.8(2)  | C56 - C57 - C58 | 120.7(2)  | N84 - C82 - N85 | 117.3(2)  |
| N14 - C12 | 1.324(3)  | N44 - C42 | 1.313(3)  | N74 - C72 | 1.331(3)  | C11 - N13 - C12 | 122.6(2)    | C34 - C33 - C38 | 118.7(2)  | C53 - C58 - C57 | 119.8(2)  | N84 - C82 - N83 | 117.7(2)  |
| N15 - C12 | 1.344(3)  | N45 - C42 | 1.343(3)  | N75 - C72 | 1.336(3)  | N12 - C11 - N13 | 125.8(2)    | C34 - C33 - N31 | 117.8(2)  | C61 - N61 - C63 | 126.5(2)  | N85 - C82 - N83 | 124.9(2)  |
| C13 - C18 | 1.391(3)  | C43 - C44 | 1.394(3)  | C73 - C74 | 1.390(3)  | N12 - C11 - N11 | 116.1(2)    | C38 - C33 - N31 | 123.4(2)  | C61 - N63 - C62 | 123.6(2)  | C88 - C83 - C84 | 119.6(2)  |
| C13 - C14 | 1.394(3)  | C43 - C48 | 1.399(3)  | C73 - C78 | 1.391(3)  | N13 - C11 - N11 | 118.0(2)    | C35 - C34 - C33 | 120.6(2)  | N62 - C61 - N63 | 124.3(2)  | C88 - C83 - N81 | 124.2(2)  |
| C14 - C15 | 1.384(3)  | C44 - C45 | 1.391(3)  | C74 - C75 | 1.389(3)  | N14 - C12 - N13 | 117.3(2)    | C36 - C35 - C34 | 120.7(2)  | N62 - C61 - N61 | 116.3(2)  | C84 - C83 - N81 | 116.1(2)  |
| C15 - C16 | 1.388(3)  | C45 - C46 | 1.380(3)  | C75 - C76 | 1.387(3)  | N14 - C12 - N15 | 117.8(2)    | C35 - C36 - C37 | 118.7(2)  | N63 - C61 - N61 | 119.3(2)  | C85 - C84 - C83 | 120.0(2)  |
| C16 - C17 | 1.387(3)  | C46 - C47 | 1.383(3)  | C76 - C77 | 1.381(3)  | N13 - C12 - N15 | 124.8(2)    | C38 - C37 - C36 | 121.2(2)  | N64 - C62 - N63 | 117.6(2)  | C86 - C85 - C84 | 120.4(2)  |
| C17 - C18 | 1.388(3)  | C47 - C48 | 1.381(3)  | C77 - C78 | 1.385(3)  | C18 - C13 - C14 | 119.6(2)    | C37 - C38 - C33 | 120.0(2)  | N64 - C62 - N65 | 117.7(2)  | C87 - C86 - C85 | 119.3(2)  |
| N21 - C21 | 1.345(3)  | N51 - C51 | 1.341(3)  | N81 - C81 | 1.361(3)  | C18 - C13 - N11 | 116.7(2)    | C41 - N41 - C43 | 129.6(2)  | N63 - C62 - N65 | 124.6(2)  | C86 - C87 - C88 | 121.3(2)  |
| N21 - C23 | 1.419(3)  | N51 - C53 | 1.418(3)  | N81 - C83 | 1.415(3)  | C14 - C13 - N11 | 123.6(2)    | C41 - N43 - C42 | 123.2(2)  | C64 - C63 - C68 | 119.4(2)  | C87 - C88 - C83 | 119.3(2)  |
| N22 - C21 | 1.335(3)  | N52 - C51 | 1.338(3)  | N82 - C81 | 1.331(3)  | C15 - C14 - C13 | 119.5(2)    | N43 - C41 - N42 | 124.2(2)  | C64 - C63 - N61 | 123.6(2)  | O13 - P11 - O11 | 113.15(8) |
| N23 - C21 | 1.338(3)  | N53 - C52 | 1.337(3)  | N83 - C81 | 1.329(3)  | C14 - C15 - C16 | 121.0(2)    | N43 - C41 - N41 | 119.6(2)  | C68 - C63 - N61 | 116.8(2)  | O13 - P11 - O12 | 113.19(8) |
| N23 - C22 | 1.341(3)  | N53 - C51 | 1.340(3)  | N83 - C82 | 1.350(3)  | C17 - C16 - C15 | 119.3(2)    | N42 - C41 - N41 | 116.0(2)  | C65 - C64 - C63 | 120.0(2)  | O11 - P11 - O12 | 111.05(8) |
| N24 - C22 | 1.325(3)  | N54 - C52 | 1.322(3)  | N84 - C82 | 1.327(3)  | C16 - C17 - C18 | 120.2(2)    | N44 - C42 - N43 | 118.7(2)  | C64 - C65 - C66 | 120.9(2)  | O13 - P11 - O14 | 103.50(8) |
| N25 - C22 | 1.336(3)  | N55 - C52 | 1.339(3)  | N85 - C82 | 1.336(3)  | C17 - C18 - C13 | 120.3(2)    | N44 - C42 - N45 | 116.7(2)  | C67 - C66 - C65 | 118.9(2)  | O11 - P11 - O14 | 106.97(8) |
| C23 - C28 | 1.386(3)  | C53 - C58 | 1.388(3)  | C83 - C88 | 1.393(3)  | C21 - N21 - C23 | 128.3(2)    | N43 - C42 - N45 | 124.3(2)  | C66 - C67 - C68 | 121.0(2)  | O12 - P11 - O14 | 108.41(8) |
| C23 - C24 | 1.392(3)  | C53 - C54 | 1.391(3)  | C83 - C84 | 1.398(3)  | C21 - N23 - C22 | 124.0(2)    | C44 - C43 - C48 | 119.0(2)  | C67 - C68 - C63 | 119.8(2)  | O22 - P21 - O23 | 113.07(8) |
| C24 - C25 | 1.383(3)  | C54 - C55 | 1.382(3)  | C84 - C85 | 1.390(3)  | N22 - C21 - N23 | 126.1(2)    | C44 - C43 - N41 | 125.1(2)  | C71 - N71 - C73 | 127.3(2)  | O22 - P21 - O21 | 113.28(8) |
| C25 - C26 | 1.385(3)  | C55 - C56 | 1.385(4)  | C85 - C86 | 1.384(3)  | N22 - C21 - N21 | 115.5(2)    | C48 - C43 - N41 | 115.9(2)  | C71 - N73 - C72 | 123.6(2)  | O23 - P21 - O21 | 111.18(8) |
| C26 - C27 | 1.380(3)  | C56 - C57 | 1.383(3)  | C86 - C87 | 1.383(3)  | N23 - C21 - N21 | 118.3(2)    | C45 - C44 - C43 | 119.6(2)  | N73 - C71 - N72 | 125.1(2)  | O22 - P21 - O24 | 103.61(8) |
| C27 - C28 | 1.387(3)  | C57 - C58 | 1.389(3)  | C87 - C88 | 1.390(3)  | N24 - C22 - N25 | 117.9(2)    | C46 - C45 - C44 | 121.1(2)  | N73 - C71 - N71 | 118.6(2)  | O23 - P21 - O24 | 106.73(8) |
| N31 - C31 | 1.342(3)  | N61 - C61 | 1.351(3)  | P11 - O13 | 1.513(1)  | N24 - C22 - N23 | 116.4(2)    | C45 - C46 - C47 | 119.2(2)  | N72 - C71 - N71 | 116.3(2)  | O21 - P21 - O24 | 108.37(8) |
| N31 - C33 | 1.417(3)  | N61 - C63 | 1.424(3)  | P11 - O11 | 1.525(2)  | N25 - C22 - N23 | 125.7(2)    | C48 - C47 - C46 | 120.6(2)  | N74 - C72 - N75 | 118.0(2)  | O31 - P31 - O33 | 110.59(8) |
| N32 - C31 | 1.336(3)  | N62 - C61 | 1.331(3)  | P11 - O12 | 1.526(2)  | C28 - C23 - C24 | 119.0(2)    | C47 - C48 - C43 | 120.3(2)  | N74 - C72 - N73 | 115.9(2)  | O31 - P31 - O32 | 111.16(8) |
| N33 - C32 | 1.332(3)  | N63 - C61 | 1.333(3)  | P11 - O14 | 1.608(1)  | C28 - C23 - N21 | 124.0(2)    | C51 - N51 - C53 | 126.9(2)  | N75 - C72 - N73 | 126.1(2)  | O33 - P31 - O32 | 112.19(8) |
| N33 - C31 | 1.339(3)  | N63 - C62 | 1.342(3)  | P21 - O22 | 1.517(2)  | C24 - C23 - N21 | 116.9(2)    | C52 - N53 - C51 | 123.8(2)  | C74 - C73 - C78 | 119.5(2)  | O31 - P31 - O34 | 106.84(8) |
| N34 - C32 | 1.324(3)  | N64 - C62 | 1.321(3)  | P21 - O23 | 1.525(2)  | C25 - C24 - C23 | 120.5(2)    | N52 - C51 - N53 | 124.9(2)  | C74 - C73 - N71 | 117.3(2)  | O33 - P31 - O34 | 107.99(8) |
| N35 - C32 | 1.339(3)  | N65 - C62 | 1.343(3)  | P21 - O21 | 1.527(2)  | C24 - C25 - C26 | 120.5(2)    | N52 - C51 - N51 | 116.4(2)  | C78 - C73 - N71 | 123.1(2)  | O32 - P31 - O34 | 107.82(8) |
| C33 - C34 | 1.387(3)  | C63 - C64 | 1.389(3)  | P21 - O24 | 1.606(1)  | C27 - C26 - C25 | 118.9(2)    | N53 - C51 - N51 | 118.6(2)  | C75 - C74 - C73 | 119.9(2)  | O42 - P41 - O43 | 111.60(9) |
| C33 - C38 | 1.394(3)  | C63 - C68 | 1.392(3)  | P31 - O31 | 1.519(1)  | C26 - C27 - C28 | 121.2(2)    | N54 - C52 - N53 | 117.8(2)  | C76 - C75 - C74 | 120.8(2)  | O42 - P41 - O41 | 110.66(9) |
| C34 - C35 | 1.386(3)  | C64 - C65 | 1.384(3)  | P31 - O33 | 1.525(1)  | C23 - C28 - C27 | 119.9(2)    | N54 - C52 - N55 | 116.8(2)  | C77 - C76 - C75 | 118.9(2)  | O43 - P41 - O41 | 110.61(9) |
| C35 - C36 | 1.379(3)  | C65 - C66 | 1.385(3)  | P31 - O32 | 1.528(1)  | C31 - N31 - C33 | 127.7(2)    | N53 - C52 - N55 | 125.4(2)  | C76 - C77 - C78 | 121.1(2)  | O42 - P41 - O44 | 108.29(8) |
| C36 - C37 | 1.386(4)  | C66 - C67 | 1.381(3)  | P31 - O34 | 1.597(1)  | C32 - N33 - C31 | 124.7(2)    | C58 - C53 - C54 | 119.5(2)  | C77 - C78 - C73 | 119.8(2)  | O43 - P41 - O44 | 109.27(8) |
| C37 - C38 | 1.380(3)  | C67 - C68 | 1.386(3)  | P41 - O42 | 1.520(2)  | N32 - C31 - N33 | 125.4(2)    | C58 - C53 - N51 | 117.6(2)  | C81 - N81 - C83 | 129.3(2)  | O41 - P41 - O44 | 106.24(8) |



**Table S7.** Selected bond lengths [Å] and angles [°] for **phbigua<sub>2</sub>HPO<sub>4</sub>1.5H<sub>2</sub>O** - continued.

| Hydrogen bonds                |        |          |          |        | Hydrogen bonds                |        |          |          |        | Hydrogen bonds                |        |          |          |        |
|-------------------------------|--------|----------|----------|--------|-------------------------------|--------|----------|----------|--------|-------------------------------|--------|----------|----------|--------|
| D-H...A                       | d(D-H) | d(H...A) | d(D...A) | <(DHA) | D-H...A                       | d(D-H) | d(H...A) | d(D...A) | <(DHA) | D-H...A                       | d(D-H) | d(H...A) | d(D...A) | <(DHA) |
| N11 - H11...O14               | 0.86   | 2.41     | 3.185(2) | 150    | N45 - H45B...N42              | 0.86   | 2.54     | 2.956(3) | 111    | N84 - H84A...O13 <sup>e</sup> | 0.86   | 2.59     | 3.284(2) | 139    |
| N12 - H12A...N63 <sup>a</sup> | 0.86   | 2.25     | 3.033(2) | 152    | N51 - H51...O31               | 0.86   | 1.88     | 2.738(2) | 172    | N84 - H84B...O4W              | 0.86   | 2.19     | 2.891(2) | 138    |
| N12 - H12B...O11              | 0.86   | 1.92     | 2.759(2) | 164    | N52 - H52A...N33 <sup>f</sup> | 0.86   | 2.25     | 3.037(2) | 153    | N85 - H85A...O13 <sup>e</sup> | 0.86   | 2.01     | 2.843(2) | 161    |
| N14 - H14A...O23 <sup>a</sup> | 0.86   | 2.20     | 2.982(2) | 151    | N52 - H52B...O33              | 0.86   | 2.28     | 3.067(2) | 153    | N85 - H85B...N82              | 0.86   | 2.44     | 2.886(3) | 113    |
| N14 - H14B...O42 <sup>a</sup> | 0.86   | 1.93     | 2.759(2) | 160    | N52 - H52B...O31              | 0.86   | 2.57     | 3.242(2) | 136    | O14 - H14...O12 <sup>j</sup>  | 1.00   | 1.65     | 2.635(2) | 171    |
| N15 - H15A...O41 <sup>a</sup> | 0.86   | 2.12     | 2.976(2) | 178    | N54 - H54A...O42 <sup>f</sup> | 0.86   | 2.06     | 2.877(2) | 158    | O24 - H24...O21 <sup>c</sup>  | 1.00   | 1.66     | 2.635(2) | 164    |
| N15 - H15B...N12              | 0.86   | 2.46     | 2.920(3) | 114    | N54 - H54B...O21 <sup>f</sup> | 0.86   | 2.15     | 2.965(2) | 157    | O34 - H34...O32 <sup>k</sup>  | 0.90   | 1.73     | 2.624(2) | 173    |
| N21 - H21...O13               | 0.86   | 1.96     | 2.777(2) | 158    | N55 - H55A...O21 <sup>f</sup> | 0.86   | 2.37     | 3.127(2) | 147    | O44 - H44...O43 <sup>l</sup>  | 0.95   | 1.60     | 2.537(2) | 168    |
| N22 - H22A...N73 <sup>b</sup> | 0.86   | 2.33     | 3.141(3) | 157    | N55 - H55B...N52              | 0.86   | 2.43     | 2.921(3) | 117    | O1W - H1W1...O41              | 0.98   | 1.81     | 2.787(2) | 172    |
| N22 - H22B...O13              | 0.86   | 2.19     | 2.939(2) | 145    | N61 - H61...O43               | 0.86   | 2.00     | 2.830(2) | 162    | O2W - H2W1...O42              | 0.90   | 2.00     | 2.883(2) | 167    |
| N24 - H24A...O44 <sup>b</sup> | 0.86   | 2.21     | 3.003(2) | 154    | N62 - H62A...N43 <sup>g</sup> | 0.86   | 2.43     | 3.220(3) | 152    | O2W - H2W2...O23              | 0.93   | 1.87     | 2.799(2) | 174    |
| N24 - H24A...O2W <sup>c</sup> | 0.86   | 2.57     | 3.090(2) | 120    | N62 - H62B...O1W              | 0.86   | 2.03     | 2.808(3) | 150    | O3W - H3W1...O23              | 0.97   | 1.94     | 2.895(2) | 170    |
| N24 - H24B...O3W <sup>c</sup> | 0.86   | 2.22     | 2.859(3) | 131    | N64 - H64A...O11 <sup>e</sup> | 0.86   | 2.27     | 3.068(2) | 154    | O3W - H3W2...O21 <sup>c</sup> | 1.02   | 1.76     | 2.763(2) | 170    |
| N25 - H25A...O44 <sup>b</sup> | 0.86   | 2.31     | 3.080(2) | 149    | N64 - H64B...O33 <sup>g</sup> | 0.86   | 1.93     | 2.776(2) | 167    | O4W - H4W1...O5W <sup>k</sup> | 0.95   | 1.80     | 2.744(2) | 173    |
| N25 - H25B...N22              | 0.86   | 2.42     | 2.942(3) | 120    | N65 - H65A...O31 <sup>g</sup> | 0.86   | 2.15     | 3.007(2) | 174    | O4W - H4W2...O32              | 0.85   | 2.06     | 2.904(2) | 170    |
| N31 - H31...O22               | 0.86   | 1.96     | 2.782(2) | 160    | N65 - H65B...N62              | 0.86   | 2.46     | 2.930(3) | 115    | O5W - H5W1...O33              | 0.87   | 1.92     | 2.788(2) | 177    |
| N32 - H32A...N23              | 0.86   | 2.33     | 3.153(3) | 160    | N71 - H71...O41               | 0.86   | 1.87     | 2.721(2) | 173    | O5W - H5W2...O11 <sup>f</sup> | 0.87   | 1.90     | 2.770(2) | 177    |
| N32 - H32B...O22              | 0.86   | 2.23     | 2.971(2) | 144    | N72 - H72A...N53 <sup>d</sup> | 0.86   | 2.34     | 3.111(2) | 149    | O6W - H6W1...O12 <sup>j</sup> | 0.92   | 1.84     | 2.751(2) | 174    |
| N34 - H34A...O33 <sup>d</sup> | 0.86   | 2.10     | 2.921(2) | 159    | N72 - H72A...N75              | 0.86   | 2.46     | 2.891(3) | 111    | O6W - H6W2...O11              | 0.92   | 2.00     | 2.892(2) | 164    |
| N34 - H34B...O12              | 0.86   | 2.10     | 2.931(2) | 162    | N72 - H72B...O42              | 0.86   | 2.14     | 2.949(2) | 157    | O1W - H1W2...O2W <sup>l</sup> | 0.99   | 1.89     | 2.787(3) | 149    |
| N35 - H35A...O12              | 0.86   | 2.52     | 3.243(2) | 143    | N74 - H74A...O34 <sup>d</sup> | 0.86   | 2.41     | 3.154(2) | 145    | C18 - H18...O4W <sup>a</sup>  | 0.93   | 2.56     | 3.161(3) | 123    |
| N35 - H35B...N32              | 0.86   | 2.46     | 2.966(3) | 118    | N74 - H74A...O5W <sup>h</sup> | 0.86   | 2.43     | 2.957(2) | 120    | C14-H14C...N13                | 0.93   | 2.46     | 2.909(3) | 109    |
| N41 - H41...O32               | 0.86   | 1.98     | 2.836(2) | 175    | N74 - H74B...O6W <sup>i</sup> | 0.86   | 2.24     | 2.888(3) | 132    | C28-H28...N23                 | 0.93   | 2.39     | 2.892(3) | 114    |
| N42 - H42A...N83              | 0.86   | 2.26     | 3.057(2) | 155    | N74 - H74A...O34 <sup>d</sup> | 0.86   | 2.41     | 3.154(2) | 145    | C38-H38...N33                 | 0.93   | 2.43     | 2.908(3) | 112    |
| N42 - H42B...O31              | 0.86   | 2.39     | 2.994(2) | 128    | N75 - H75B...N72              | 0.86   | 2.37     | 2.891(3) | 119    | C44-H44C...N43                | 0.93   | 2.32     | 2.883(3) | 119    |
| N42 - H42B...O4W              | 0.86   | 2.40     | 3.092(2) | 138    | N81 - H81...O24               | 0.86   | 2.29     | 3.091(2) | 154    | C54-H54...N53                 | 0.93   | 2.47     | 2.905(3) | 109    |
| N44 - H44A...O1W <sup>b</sup> | 0.86   | 1.87     | 2.686(3) | 158    | N82 - H82A...N13 <sup>e</sup> | 0.86   | 2.29     | 3.066(2) | 150    | C64-H64...N63                 | 0.93   | 2.41     | 2.880(3) | 111    |
| N44 - H44B...O22              | 0.86   | 2.21     | 2.992(3) | 151    | N82 - H82A...N85              | 0.86   | 2.46     | 2.886(3) | 111    | C78-H78...N73                 | 0.93   | 2.44     | 2.891(3) | 110    |
| N44 - H44B...O24              | 0.86   | 2.29     | 2.992(2) | 139    | N82 - H82B...O23              | 0.86   | 1.96     | 2.799(2) | 165    | C88-H88...N83                 | 0.93   | 2.42     | 2.928(3) | 114    |
| N45 - H45A...O22              | 0.86   | 2.30     | 3.062(2) | 148    | N84 - H84A...O14 <sup>e</sup> | 0.86   | 2.21     | 2.971(2) | 147    |                               |        |          |          |        |

*Note.* Equivalent positions: (a) -1+x,-1+y, z; (b) -1+x, y, z; (c) 1-x, 1-y, 2-z; (d) x, -1+y, z; (e) 1+x, 1+y, z; (f) x, 1+y, z; (g) 1+x, y, z; (h) 1-x, 1-y, 1-z; (i) 1-x, -y, 1-z; (j) -x, -y, 1-z; (k) 1-x, 2-y, 1-z; (l) 2-x, 1-y, 2-z

**Table S8.** Selected bond lengths [Å] and angles [°] for **phbigua<sub>2</sub>HPO<sub>3</sub>**.

| Bond       | Value (Å)  | Angle           | Value (°)  | Hydrogen bonds               |        |          |            |        |
|------------|------------|-----------------|------------|------------------------------|--------|----------|------------|--------|
|            |            |                 |            | D-H...A                      | d(D-H) | d(H...A) | d(D...A)   | <(DHA) |
| P1 - O1    | 1.5087(13) | O1 - P1 - O3    | 118.00(8)  | N11 - H11...O2 <sup>a</sup>  | 0.89   | 2.01     | 2.8668(19) | 162    |
| P1 - O3    | 1.5114(14) | O1 - P1 - O2    | 110.73(7)  | N12 - H12A...O1 <sup>a</sup> | 0.87   | 1.95     | 2.821(2)   | 179    |
| P1 - O2    | 1.5360(13) | O3 - P1 - O2    | 110.27(7)  | N14 - H14B...O3 <sup>b</sup> | 0.94   | 2.22     | 3.156(2)   | 169    |
| P1 - H1    | 1.36(2)    | O1 - P1 - H1    | 105.2(10)  | N15 - H15A...O3              | 0.86   | 1.93     | 2.7750(19) | 166    |
| C11 - N13  | 1.321(2)   | O3 - P1 - H1    | 103.1(10)  | N15 - H15B...O2 <sup>b</sup> | 0.90   | 1.94     | 2.8228(18) | 167    |
| C11 - N12  | 1.346(2)   | O2 - P1 - H1    | 108.7(9)   | N21 - H21...O3 <sup>c</sup>  | 0.86   | 1.98     | 2.839(2)   | 172    |
| C11 - N11  | 1.352(2)   | N13 - C11 - N12 | 125.75(17) | N22 - H22A...O2 <sup>c</sup> | 0.89   | 2.13     | 2.960(2)   | 155    |
| N11 - C13  | 1.411(2)   | N13 - C11 - N11 | 118.91(17) | N22 - H22B...N24             | 0.92   | 2.50     | 2.947(2)   | 110    |
| C12 - N15  | 1.321(2)   | N12 - C11 - N11 | 115.20(15) | N24 - H24B...O1 <sup>b</sup> | 0.84   | 2.26     | 3.098(2)   | 174    |
| C12 - N13  | 1.344(2)   | C11 - N11 - C13 | 128.21(15) | N25 - H25A...O1              | 0.88   | 1.92     | 2.783(2)   | 166    |
| C12 - N14  | 1.351(2)   | N15 - C12 - N13 | 117.16(16) | N25 - H25B...O2 <sup>b</sup> | 0.93   | 1.93     | 2.843(2)   | 169    |
| C13 - C14  | 1.396(2)   | N15 - C12 - N14 | 118.83(16) | C18-H18...N13                | 0.95   | 2.52     | 2.967(3)   | 109    |
| C13 - C18  | 1.397(3)   | N13 - C12 - N14 | 123.99(16) | C24-H24...N15 <sup>c</sup>   | 0.95   | 2.54     | 3.292(2)   | 136    |
| C14 - C15  | 1.387(3)   | C14 - C13 - C18 | 119.27(18) | C27-H27...N15 <sup>d</sup>   | 0.95   | 2.61     | 3.440(2)   | 147    |
| N14 - H14A | 0.8811     | C14 - C13 - N11 | 116.54(17) |                              |        |          |            |        |
| C15 - C16  | 1.383(3)   | C18 - C13 - N11 | 123.99(16) |                              |        |          |            |        |
| C16 - C17  | 1.389(3)   | C11 - N13 - C12 | 122.71(16) |                              |        |          |            |        |
| C17 - C18  | 1.391(3)   | C15 - C14 - C13 | 120.54(18) |                              |        |          |            |        |
| C21 - N23  | 1.319(2)   | C16 - C15 - C14 | 120.52(19) |                              |        |          |            |        |
| C21 - N22  | 1.345(2)   | C15 - C16 - C17 | 119.0(2)   |                              |        |          |            |        |
| C21 - N21  | 1.355(2)   | C16 - C17 - C18 | 121.3(2)   |                              |        |          |            |        |
| N21 - C23  | 1.414(2)   | C17 - C18 - C13 | 119.34(19) |                              |        |          |            |        |
| C22 - N25  | 1.321(2)   | N23 - C21 - N22 | 125.64(17) |                              |        |          |            |        |
| C22 - N24  | 1.340(2)   | N23 - C21 - N21 | 119.05(16) |                              |        |          |            |        |
| C22 - N23  | 1.351(2)   | N22 - C21 - N21 | 115.23(16) |                              |        |          |            |        |
| C23 - C24  | 1.389(2)   | C21 - N21 - C23 | 124.56(15) |                              |        |          |            |        |
| C23 - C28  | 1.396(2)   | N25 - C22 - N24 | 119.11(16) |                              |        |          |            |        |
| C24 - C25  | 1.392(3)   | N25 - C22 - N23 | 117.47(16) |                              |        |          |            |        |
| N24 - H24A | 0.8514     | N24 - C22 - N23 | 123.37(16) |                              |        |          |            |        |
| C25 - C26  | 1.376(3)   | C24 - C23 - C28 | 119.55(16) |                              |        |          |            |        |
| C26 - C27  | 1.388(3)   | C24 - C23 - N21 | 117.94(16) |                              |        |          |            |        |
| C27 - C28  | 1.388(3)   | C28 - C23 - N21 | 122.39(16) |                              |        |          |            |        |
|            |            | C21 - N23 - C22 | 122.34(16) |                              |        |          |            |        |
|            |            | C23 - C24 - C25 | 120.47(18) |                              |        |          |            |        |

*Note.* Equivalent positions: (a) 1+x, y, 1+z; (b) 1+x, y, z; (c) 1-x, -1/2+y, 1-z; (d) -1+x, y, -1+z

**Table S9.** Selected bond lengths [Å] and angles [°] for **phbigua<sub>2</sub>HPO<sub>3</sub>2H<sub>2</sub>O**.

| Bond/Angle   | Value (Å/°) | Angle           | Value (°) | Hydrogen bonds                |        |          |          |        |
|--------------|-------------|-----------------|-----------|-------------------------------|--------|----------|----------|--------|
|              |             |                 |           | D-H...A                       | d(D-H) | d(H...A) | d(D...A) | <(DHA) |
| P1 - O3      | 1.519(1)    | O2 - P1 - H1    | 105.4(6)  | N11 - H11...O2 <sup>a</sup>   | 0.92   | 2.03     | 2.912(2) | 160    |
| P1 - O2      | 1.519(1)    | O1 - P1 - H1    | 104.9(6)  | N12 - H12A...O3 <sup>a</sup>  | 0.86   | 1.93     | 2.784(2) | 175    |
| P1 - O1      | 1.519(1)    | C11 - N11 - C13 | 125.8(1)  | N12 - H12B...N13 <sup>a</sup> | 0.87   | 2.58     | 3.169(2) | 125    |
| P1 - H1      | 1.32(1)     | C11 - N13 - C12 | 124.0(1)  | N14 - H14B...O2W <sup>b</sup> | 0.87   | 2.19     | 3.016(2) | 160    |
| N11 - C11    | 1.355(2)    | N13 - C11 - N12 | 125.5(1)  | N14 - H14A...N12              | 0.91   | 2.51     | 2.911(2) | 107    |
| N11 - C13    | 1.418(2)    | N13 - C11 - N11 | 118.2(1)  | N15 - H15A...O3               | 0.92   | 1.95     | 2.864(2) | 175    |
| N12 - C11    | 1.333(2)    | N12 - C11 - N11 | 116.2(1)  | N15 - H15B...O1W <sup>b</sup> | 0.86   | 1.99     | 2.832(2) | 169    |
| N13 - C11    | 1.329(2)    | N15 - C12 - N13 | 117.4(1)  | N21 - H21...O2W               | 0.91   | 1.99     | 2.887(2) | 166    |
| N13 - C12    | 1.335(2)    | N15 - C12 - N14 | 118.5(1)  | N22 - H22A...O1 <sup>c</sup>  | 0.92   | 2.03     | 2.906(2) | 159    |
| N14 - C12    | 1.350(2)    | N13 - C12 - N14 | 124.1(1)  | N22 - H22B...N23 <sup>d</sup> | 0.91   | 2.39     | 3.172(2) | 144    |
| N15 - C12    | 1.322(2)    | C14 - C13 - C18 | 119.7(1)  | N24 - H24A...N22              | 0.90   | 2.52     | 2.897(2) | 106    |
| C13 - C14    | 1.387(2)    | C14 - C13 - N11 | 117.0(1)  | N24 - H24B...O2 <sup>e</sup>  | 0.94   | 1.91     | 2.857(2) | 179    |
| C13 - C18    | 1.392(2)    | C18 - C13 - N11 | 123.4(1)  | N25 - H25A...O1W <sup>e</sup> | 0.91   | 1.99     | 2.887(2) | 169    |
| C14 - C15    | 1.377(2)    | C15 - C14 - C13 | 120.3(1)  | N25 - H25B...O1 <sup>f</sup>  | 0.92   | 2.09     | 2.960(2) | 158    |
| C15 - C16    | 1.383(2)    | C14 - C15 - C16 | 120.5(1)  | O1W - H1A...O2                | 0.94   | 1.80     | 2.685(1) | 155    |
| C16 - C17    | 1.384(2)    | C15 - C16 - C17 | 119.1(1)  | O1W - H1B...O1 <sup>c</sup>   | 0.89   | 1.95     | 2.812(1) | 162    |
| C17 - C18    | 1.382(2)    | C18 - C17 - C16 | 121.1(1)  | O2W - H2A...O1 <sup>c</sup>   | 0.91   | 1.84     | 2.720(1) | 163    |
| N21 - C21    | 1.347(2)    | C17 - C18 - C13 | 119.3(1)  | O2W - H2B...O3                | 0.92   | 1.84     | 2.743(1) | 165    |
| N21 - C23    | 1.422(2)    | C21 - N21 - C23 | 127.2(1)  | C18 - H18...N13               | 0.93   | 2.56     | 2.911(2) | 103    |
| N22 - C21    | 1.337(2)    | C21 - N23 - C22 | 123.1(1)  | C28 - H28...N23               | 0.93   | 2.46     | 2.901(2) | 109    |
| N23 - C21    | 1.332(2)    | N23 - C21 - N22 | 124.9(1)  |                               |        |          |          |        |
| N23 - C22    | 1.342(2)    | N23 - C21 - N21 | 118.9(1)  |                               |        |          |          |        |
| N24 - C22    | 1.339(2)    | N22 - C21 - N21 | 116.2(1)  |                               |        |          |          |        |
| N25 - C22    | 1.328(2)    | N25 - C22 - N24 | 117.7(1)  |                               |        |          |          |        |
| C23 - C28    | 1.386(2)    | N25 - C22 - N23 | 117.3(1)  |                               |        |          |          |        |
| C23 - C24    | 1.389(2)    | N24 - C22 - N23 | 124.9(1)  |                               |        |          |          |        |
| C24 - C25    | 1.388(2)    | C28 - C23 - C24 | 119.4(1)  |                               |        |          |          |        |
| C25 - C26    | 1.377(2)    | C28 - C23 - N21 | 122.8(1)  |                               |        |          |          |        |
| C26 - C27    | 1.383(2)    | C24 - C23 - N21 | 117.6(1)  |                               |        |          |          |        |
| C27 - C28    | 1.381(2)    | C25 - C24 - C23 | 119.9(1)  |                               |        |          |          |        |
| O3 - P1 - O2 | 111.75(6)   | C26 - C25 - C24 | 120.6(1)  |                               |        |          |          |        |
| O3 - P1 - O1 | 112.91(6)   | C25 - C26 - C27 | 119.3(1)  |                               |        |          |          |        |
| O2 - P1 - O1 | 113.87(6)   | C28 - C27 - C26 | 120.7(2)  |                               |        |          |          |        |
| O3 - P1 - H1 | 107.2(6)    | C27 - C28 - C23 | 120.0(1)  |                               |        |          |          |        |

*Note.* Equivalent positions: (a) 1/2-x, 1/2+y, 3/2-z; (b) x, 1+y, z; (c) 1-x, -y, 1-z; (d) 1/2-x, -1/2-y, -1/2+z; (e) -1/2+x, -1/2-y, -1/2+z; (f) -1/2+x, 1/2-y, -1/2+z

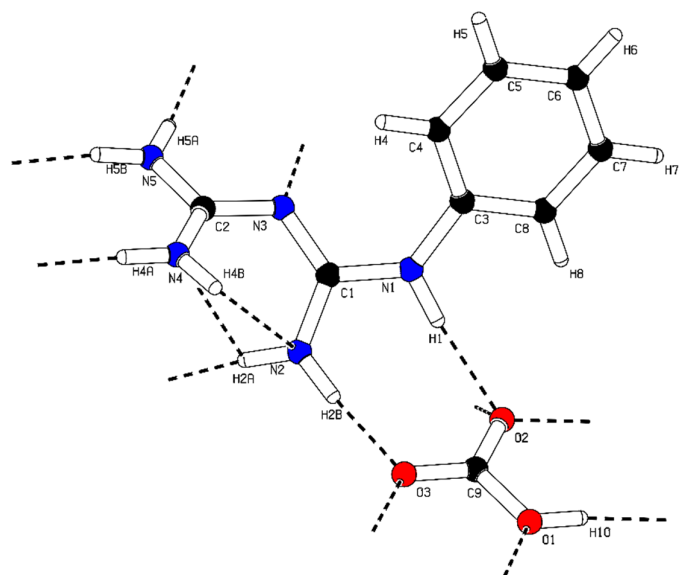

**Figure S1.** Atom numbering of **phbiguaNO<sub>3</sub>**. Dashed lines indicate hydrogen bonds.

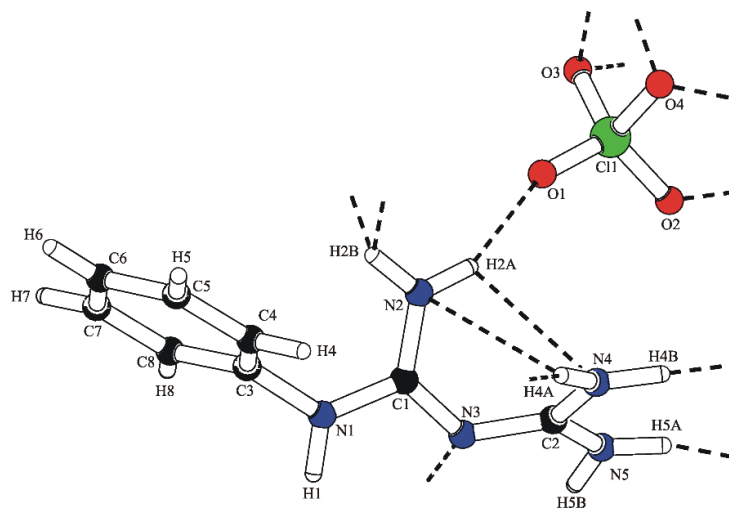

**Figure S2.** Atom numbering of **phbiguaClO<sub>4</sub>**. Dashed lines indicate hydrogen bonds.

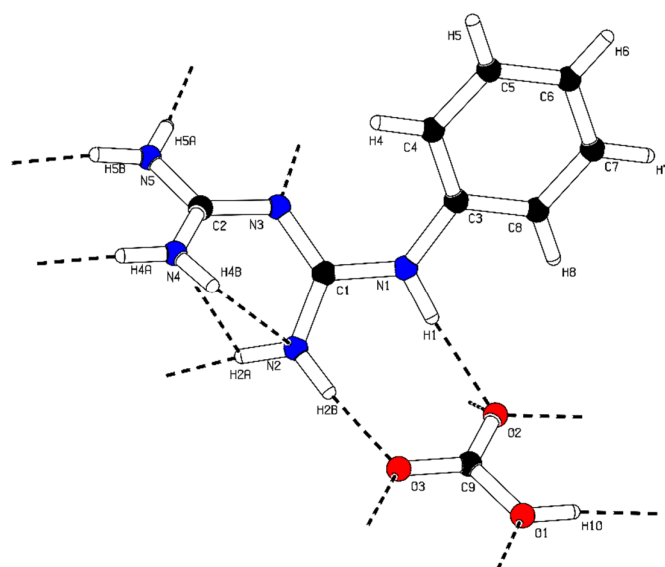

**Figure S3.** Atom numbering of **phbiguaHCO<sub>3</sub>**. Dashed lines indicate hydrogen bonds.

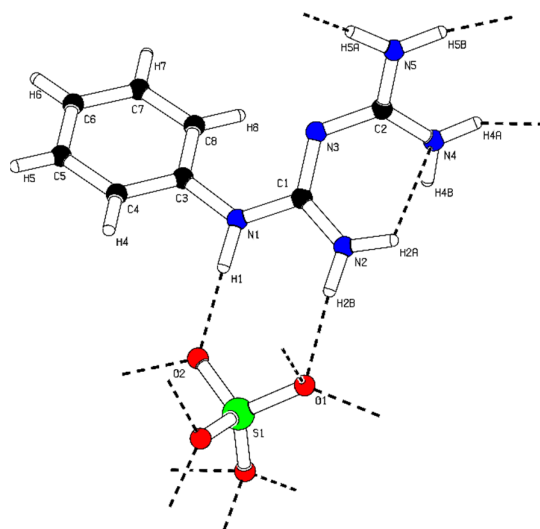

**Figure S4.** Atom numbering of **phbigua<sub>2</sub>SO<sub>4</sub>**. Dashed lines indicate hydrogen bonds.

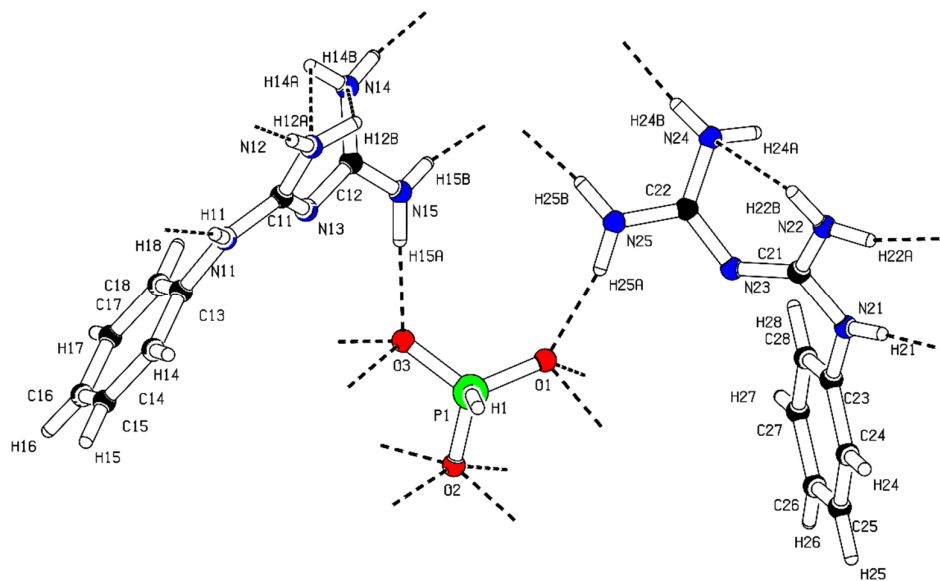

Figure S5. Atom numbering of **phbigua<sub>2</sub>HPO<sub>3</sub>**. Dashed lines indicate hydrogen bonds.

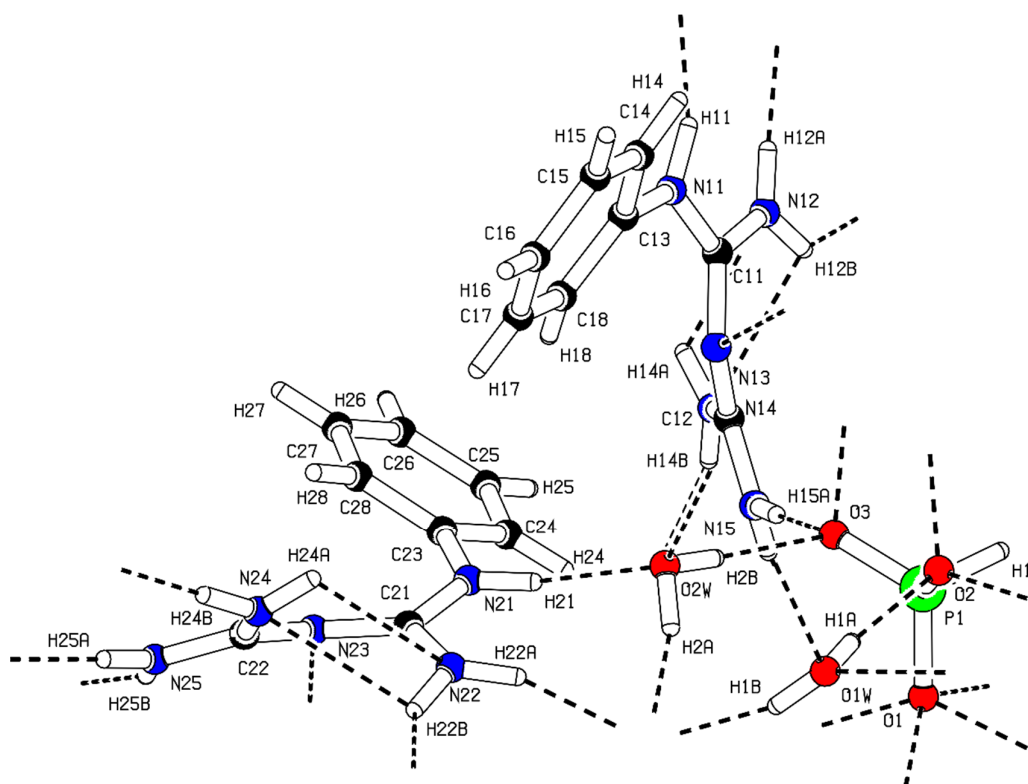

Figure S6. Atom numbering of **phbigua<sub>2</sub>HPO<sub>3</sub>·2H<sub>2</sub>O**. Dashed lines indicate hydrogen bonds.

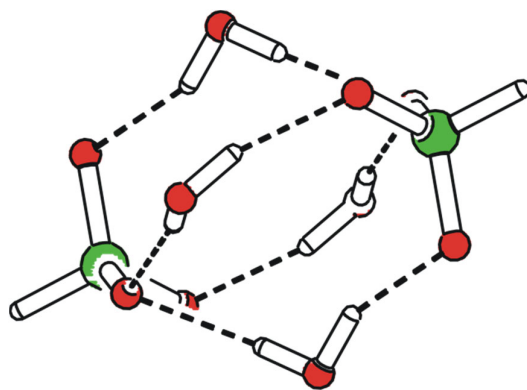

**Figure S7.** Detail of pairs of phosphite anions and water molecules inter-connected via hydrogen bonds in the crystal structure of **phbigua<sub>2</sub>HPO<sub>3</sub>·2H<sub>2</sub>O**.

**Listing S1.** List of recorded IR and Raman maxima (cm<sup>-1</sup>) of **phbiguaNO<sub>3</sub>**, **phbiguaClO<sub>4</sub>**, **phbiguaHCO<sub>3</sub>**, **phbigua<sub>2</sub>SO<sub>4</sub>**, **phbigua<sub>2</sub>HPO<sub>4</sub>·1.5H<sub>2</sub>O**, **phbigua<sub>2</sub>HPO<sub>3</sub>** and **phbigua<sub>2</sub>HPO<sub>3</sub>·2H<sub>2</sub>O**.

**PhbiguaNO<sub>3</sub>** FTIR: 3468 m; 3430 s; 3333 s; 3215 s; 2724 w; 2416 w; 1776 w; 1662 s; 1650 s; 1629 s; 1603 m; 1583 m; 1530 vs; 1496 s; 1451 s; 1397 m; 1371 s; 1308 m; 1295 m; 1259 m; 1190 m; 1157 w; 1081 m; 1059 m; 1052 m; 983 w; 929 w; 907 w; 846 w; 839 w; 821 m; 763 m; 748 m; 724 m; 716 m; 696 m; 638 m; 615 m; 601 m; 523 m; 501 m; 491 m; 405 m.

FT Raman: 3350 wb; 3305 wb; 3240 wb; 3225 wb; 3066 m; 3057 m; 1664 w; 1634 m; 1602 s; 1585 m; 1555 m; 1498 m; 1450 w; 1375 w; 1295 s; 1259 s; 1177 m; 1158 m; 1081 w; 1056 vs; 1027 m; 1004 s; 967 w; 928 m; 846 m; 762 w; 745 m; 724 m; 678 w; 634 w; 614 m; 526 w; 501 w; 492 w; 409 w; 399 w; 382 w; 335 w; 270 m; 227 m; 148 m; 132 s.

**PhbiguaClO<sub>4</sub>** FTIR: 3424 s; 3379 s; 3352 s; 3250 s; 3143 s; 3055 m; 2756 w; 2468 w; 2003 w; 1672 s; 1636 s; 1597 m; 1576 s; 1530 vs; 1493 s; 1452 m; 1415 w; 1380 m; 1238 m; 1122 sh; 1085 s; 1028 m; 943 w; 935 w; 923 w; 853 w; 783 w; 752 w; 726 m; 699 m; 673 w; 624 m; 600 wb; 502 m; 460 w. FT Raman: 3376 w; 3354 wb; 3249 wb; 3070 s; 3013 w; 2975 vw; 1677 vw; 1638 w; 1596 m; 1584 w; 1569 w; 1550 w; 1527 w; 1450 w; 1314 w; 1233 m; 1174 w; 1158 w; 1125 wb; 1070 wb; 1026 w; 1000 s; 944 s; 935 vs; 857 w; 753 w; 705 w; 665 w; 625 m; 615 sh; 533 w; 506 vw; 461 m; 414 w; 396 w; 318 w; 289 w; 235 m; 140 m.

**PhbiguaHCO<sub>3</sub>** FTIR: 3467 s; 3293 sb; 3219 s; 3083 sb; 3018 sb 2806 mb; 2573 wb; 2346 w; 1953 w; 1702 m; 1652 sb; 1625 m; 1601 m; 1579 m; 1520 sh; 1498 s; 1487 s; 1452 m; 1404 m; 1346 m; 1306 m; 1258 w; 1200 m; 1178 w; 1147 w; 1097 w; 1068 w; 1015 m; 941 m; 904 m; 859 m; 843 m; 753 s; 689 s; 673 s; 637 m; 545 m; 504 m; 442 m; 410 w. FT Raman: 3467 w; 3220 w; 3064 s; 3037 w; 2560 vw; 1697 w; 1655 w; 1602 vs; 1555 m; 1531 w; 1502 m; 1487 w; 1451 w; 1343 w; 1299 s; 1256 m; 1200 w; 1177 m; 1158 m; 1088 m; 1065 m; 1028 s; 1012 s; 998 vs; 939 m; 865 m; 749 m; 723 w; 682 w; 636 m; 614 m; 546 m; 506 m; 436 w; 398 w; 326 m; 299 m; 248 m; 207 w; 183 w.

**Phbigua<sub>2</sub>SO<sub>4</sub>** FTIR: 3465 m; 3349 m; 3290 mb; 3125 sb; 2990 mb; 2730 mb; 1720 sh; 1670 sh; 1637 s; 1602 m; 1582 m; 1535 sb; 1497 s; 1451 m; 1399 m; 1309 w; 1293 w; 1261 w; 1195 w; 1176 w; 1157 w; 1101 vs; 1077 sh; 1057 m; 975 w; 949 w; 907 w; 839 w; 766 m; 750 m; 724 m; 694 s; 674 sh; 622 m; 610 m; 535 m; 505 m; 492 sh. FT Raman: 3450 wb; 3300 wb; 3170 wb; 3092 w; 3068 m; 3060 sh; 3035 w; 2990 wb; 1675 w; 1640 w; 1629 w; 1602 s; 1586 m; 1557 m; 1497 w; 1450 w; 1292 s; 1261 s; 1176 w; 1157 m; 1078 w; 1058 w; 1025 m; 1002 vs; 980 vs; 926 m; 842 m; 767 w; 749 m; 673 w; 613 m; 532 w; 504 w; 469 w; 432 w; 409 w; 379 w; 340 w; 266 m; 228 w; 185 m; 152 m; 133 m.

**Phbigua<sub>2</sub>HPO<sub>4</sub>·1.5H<sub>2</sub>O** FTIR: 3447 m; 3335 mb; 3305 sh; 3186 mb; 3060 sh; 2890 mb; 2430 wb; 1644 s; 1604 s; 1585 s; 1575 s; 1555 s; 1535 vs; 1497 s; 1450 m; 1400 mb; 1296 w; 1261 m; 1200 wb; 1179 w; 1065 m; 1049 m; 989 m; 926 w; 908 w; 860 m; 838 m; 761 s; 737 m; 717 m; 695 m; 632 m; 594 w; 543 m; 521 m; 500 m; 485 m; 413 m. FT Raman: 3443 w; 3200 wb; 3074 m; 3061 m; 1655 w; 1602 s; 1554 m; 1498 m;

1447 w; 1327 w; 1296 s; 1262 s; 1178 m; 1163 w; 1154 m; 1081 w; 1057 w; 1029 m; 999 vs; 925 m; 915 m; 906 m; 855 m; 846 m; 754 m; 727 w; 675 w; 639 w; 616 m; 523 w; 502 m; 490 m; 411 m; 376 m; 319 w; 261 m; 238 w; 223 m; 149 s; 126 s.

**Phbigua<sub>2</sub>HPO<sub>3</sub>** FTIR: 3469 m; 3445 m; 3300 mb; 3010 mb; 2284 m; 1654 sh; 1637 s; 1630 sh; 1602 s; 1583 s; 1534 vs; 1497 s; 1449 s; 1407 sh; 1396 m; 1294 w; 1263 wb; 1189 wb; 1125 m; 1090 m; 1076 sh; 1034 m; 1011 w; 989 w; 978 m; 922 w; 909 w; 863 sh; 812 mb; 769 m; 744 m; 716 m; 696 m; 628 m; 567 m; 544 m; 504 m; 453 m; 420 sh; 407 w. FT Raman: 3076 m; 3060 m; 2282 m; 1655 sh; 1628 sh; 1602 s; 1556 m; 1498 m; 1448 w; 1294 s; 1262 s; 1176 m; 1158 m; 1081 w; 1058 w; 1028 m; 1002 vs; 977 m; 923 m; 847 m; 747 m; 714 w; 678 w; 615 m; 545 w; 503 w; 491 w; 410 w; 380 w; 360 w; 339 w; 266 m; 238 m; 168 sh; 154 s.

**Phbigua<sub>2</sub>HPO<sub>3</sub>·2H<sub>2</sub>O** FTIR: 3442 m; 3310 m; 3097 sb; 2739 sh; 2347 m; 2287 w; 2040 w; 1943 w; 1869 w; 1684 sh; 1659 sb; 1648 m; 1637 m; 1630 m; 1619 sh; 1604 m; 1583 m; 1559 m; 1541 s; 1535 s; 1517 sb; 1497 s; 1483 sh; 1449 s; 1400 sb; 1311 w; 1296 m; 1257 m; 1190 mb; 1177 m; 1162 w; 1090 sb; 1072 s; 1052 s; 1039 s; 1028 m; 978 m; 924 w; 907 m; 833 m; 815 mb; 763 s; 738 m; 734 m; 722 m; 695 s; 680 sh; 632 m; 615 m; 560 m; 533 m; 495 mb; 467 m; 455 m; 426 m; 420 m. FT Raman: 3439 w; 3200 mb; 3080 m; 3067 m; 3060 m; 3051 sh; 2347 m; 1656 w; 1635 vw; 1602 vs; 1545 m; 1497 m; 1449 w; 1295 s; 1256 s; 1177 m; 1156 m; 1078 w; 1029 m; 1000 vs; 978 m; 923 m; 906 w; 841 m; 767 w; 744 w; 677 w; 631 w; 615 m; 532 w; 502 m; 431 w; 412 m; 379 w; 353 w; 274 m; 244 m; 190 m; 160 m; 138 s.

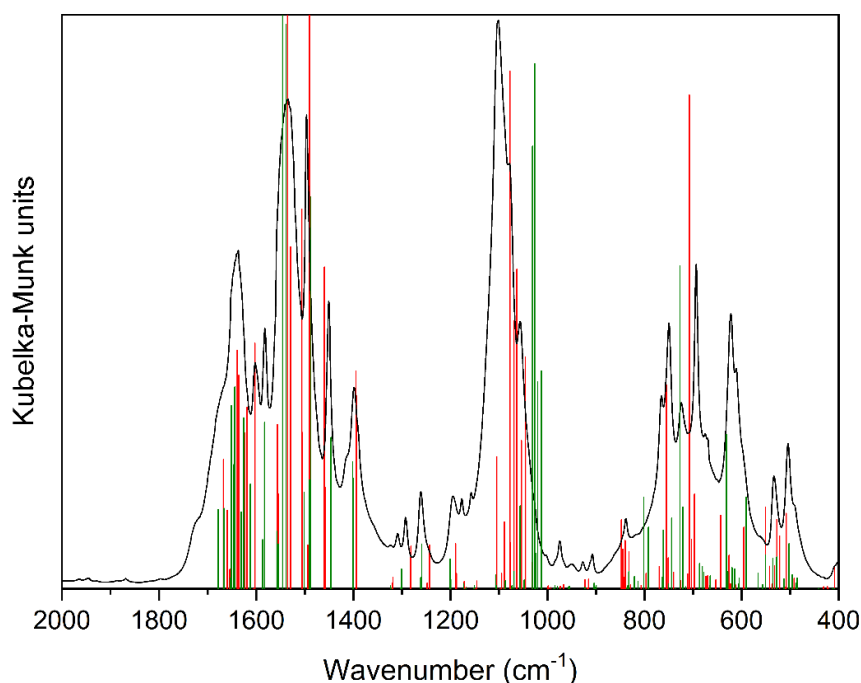

**Figure S8.** The comparison of calculated (CRYSTAL17 programme) vibrational modes using CAM-B3LYP (red lines) and B3LYP (green lines) functionals with recorded DRIFTS spectrum of **phbigua<sub>2</sub>SO<sub>4</sub>**.



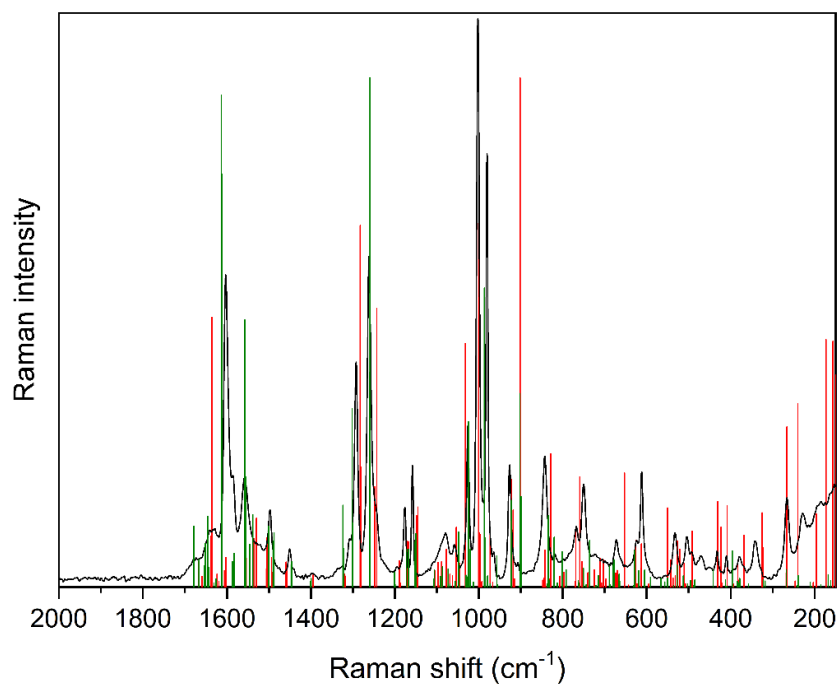

**Figure S9.** The comparison of calculated (CRYSTAL17 programme) vibrational modes using CAM-B3LYP (red lines) and B3LYP (green lines) functionals with recorded Raman spectrum of **phbigua<sub>2</sub>SO<sub>4</sub>**.

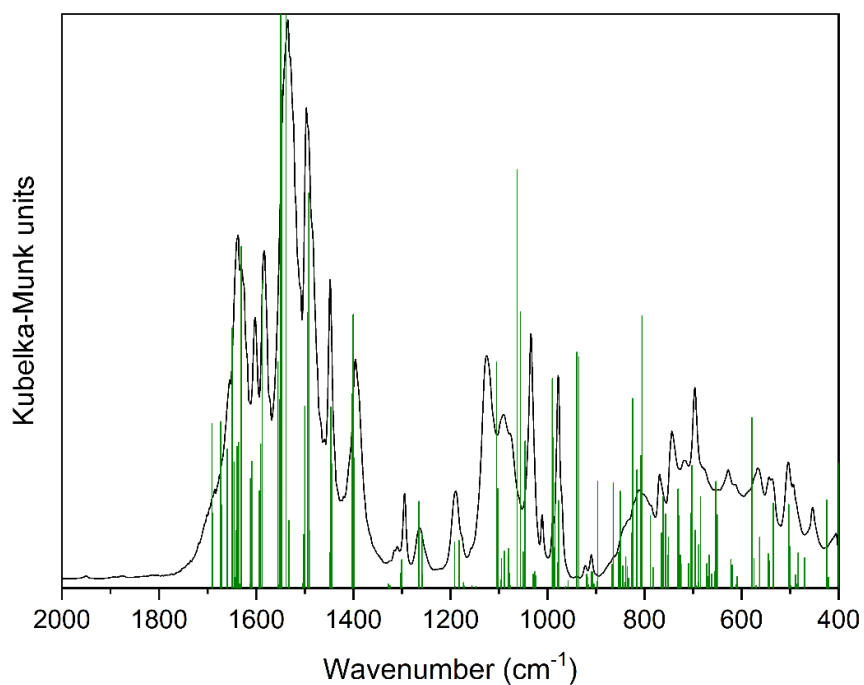

**Figure S10.** The comparison of calculated (CRYSTAL17 programme) vibrational modes using B3LYP (green lines) functional with recorded DRIFTS spectrum of **phbigua<sub>2</sub>HPO<sub>3</sub>**.

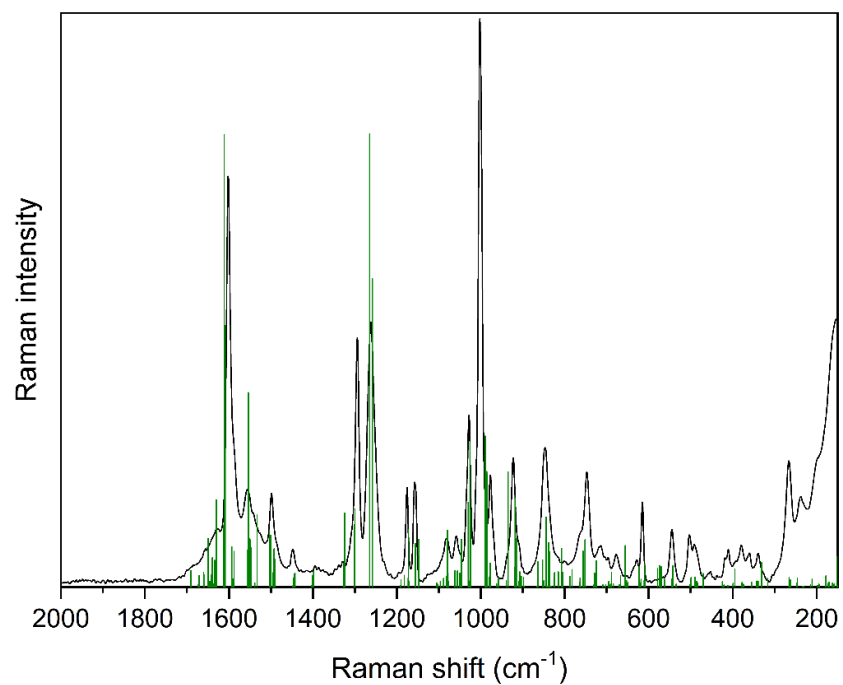

**Figure S11.** The comparison of calculated (CRYSTAL17 programme) vibrational modes using B3LYP (green lines) functional with recorded Raman spectrum of **phbigua<sub>2</sub>HPO<sub>3</sub>**.

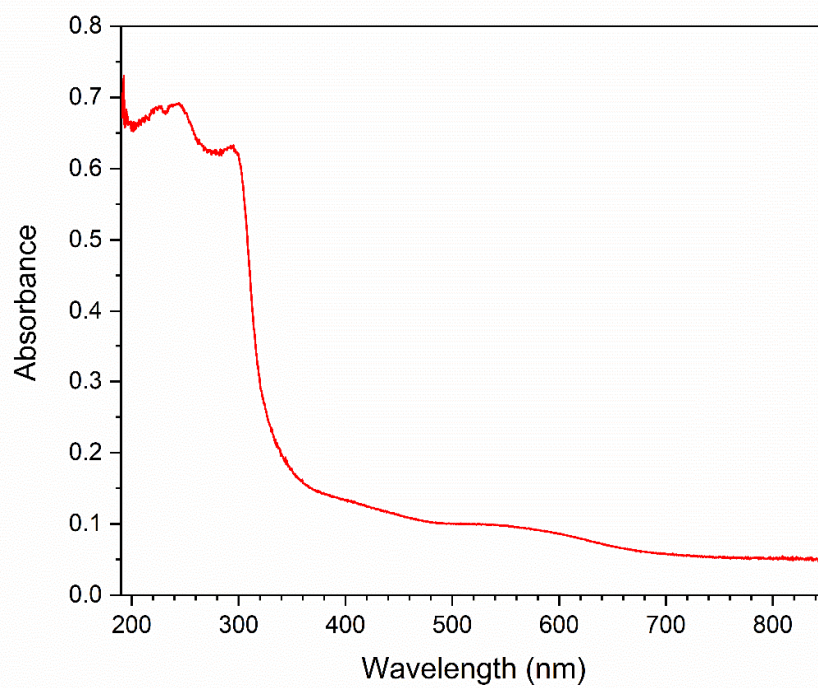

**Figure S12.** UV-Vis spectrum of powdered **phbigua<sub>2</sub>SO<sub>4</sub>**.

**Table S10.** Experimental powder diffraction data for **phbiguaNO<sub>3</sub>**.

| <b>2 Theta (°)</b> | <b>d (Å)</b> | <b>Intensity (%)</b> | <b>2 Theta (°)</b> | <b>d (Å)</b> | <b>Intensity (%)</b> |
|--------------------|--------------|----------------------|--------------------|--------------|----------------------|
| 8.78               | 10.06        | 100                  | 25.46              | 3.50         | 6                    |
| 9.41               | 9.39         | 5                    | 26.24              | 3.39         | 17                   |
| 13.83              | 6.40         | 28                   | 26.43              | 3.37         | 43                   |
| 16.04              | 5.52         | 6                    | 26.55              | 3.35         | 52                   |
| 17.62              | 5.03         | 16                   | 27.64              | 3.23         | 2                    |
| 17.95              | 4.94         | 10                   | 27.88              | 3.20         | 2                    |
| 18.60              | 4.77         | 5                    | 28.44              | 3.14         | 12                   |
| 18.90              | 4.69         | 14                   | 29.26              | 3.05         | 3                    |
| 19.59              | 4.53         | 1                    | 29.59              | 3.02         | 16                   |
| 20.28              | 4.38         | 8                    | 30.16              | 2.96         | 11                   |
| 21.11              | 4.20         | 14                   | 31.10              | 2.87         | 5                    |
| 21.26              | 4.18         | 22                   | 31.22              | 2.87         | 4                    |
| 22.78              | 3.90         | 59                   | 35.51              | 2.53         | 3                    |
| 23.00              | 3.86         | 11                   | 35.69              | 2.52         | 2                    |
| 23.84              | 3.73         | 11                   | 45.06              | 2.01         | 1                    |

**Table S11.** Experimental powder diffraction data for **phbiguaClO<sub>4</sub>**.

| <b>2 Theta (°)</b> | <b>d (Å)</b> | <b>Intensity (%)</b> | <b>2 Theta (°)</b> | <b>d (Å)</b> | <b>Intensity (%)</b> |
|--------------------|--------------|----------------------|--------------------|--------------|----------------------|
| 9.84               | 8.99         | 16                   | 23.94              | 3.71         | 14                   |
| 9.97               | 8.86         | 18                   | 24.19              | 3.68         | 14                   |
| 15.28              | 5.79         | 20                   | 25.17              | 3.54         | 67                   |
| 16.22              | 5.46         | 21                   | 26.05              | 3.42         | 12                   |
| 17.67              | 5.01         | 23                   | 26.25              | 3.39         | 9                    |
| 18.98              | 4.67         | 38                   | 26.67              | 3.34         | 7                    |
| 19.17              | 4.63         | 26                   | 27.08              | 3.29         | 10                   |
| 19.43              | 4.56         | 44                   | 27.16              | 3.28         | 10                   |
| 19.98              | 4.44         | 100                  | 27.87              | 3.20         | 7                    |
| 20.36              | 4.36         | 13                   | 29.53              | 3.02         | 7                    |
| 20.52              | 4.33         | 16                   | 30.13              | 2.96         | 9                    |
| 20.92              | 4.24         | 23                   | 30.71              | 2.91         | 12                   |
| 22.35              | 3.97         | 59                   | 31.54              | 2.83         | 10                   |
| 23.33              | 3.81         | 10                   | 33.25              | 2.69         | 7                    |
| 23.61              | 3.77         | 11                   | 33.58              | 2.67         | 10                   |

**Table S12.** Experimental powder diffraction data for **phbiguaHCO<sub>3</sub>**.

| <b>2 Theta (°)</b> | <b>d (Å)</b> | <b>Intensity (%)</b> | <b>2 Theta (°)</b> | <b>d (Å)</b> | <b>Intensity (%)</b> |
|--------------------|--------------|----------------------|--------------------|--------------|----------------------|
| 8.78               | 10.07        | 100                  | 23.62              | 3.77         | 2                    |
| 10.74              | 8.24         | 1                    | 25.32              | 3.52         | 1                    |
| 13.46              | 6.58         | 6                    | 26.51              | 3.36         | 58                   |
| 14.54              | 6.09         | 22                   | 29.47              | 3.03         | 12                   |
| 15.10              | 5.87         | 14                   | 30.07              | 2.97         | 4                    |
| 15.85              | 5.59         | 2                    | 30.68              | 2.91         | 5                    |
| 16.28              | 5.45         | 20                   | 31.13              | 2.87         | 2                    |
| 17.60              | 5.04         | 23                   | 31.48              | 2.84         | 5                    |
| 18.35              | 4.83         | 14                   | 31.85              | 2.81         | 2                    |
| 20.09              | 4.42         | 2                    | 33.51              | 2.67         | 2                    |
| 20.62              | 4.31         | 2                    | 34.23              | 2.62         | 5                    |
| 21.40              | 4.15         | 10                   | 35.17              | 2.55         | 2                    |
| 21.88              | 4.06         | 52                   | 35.58              | 2.52         | 4                    |
| 22.51              | 3.95         | 6                    | 36.58              | 2.46         | 2                    |
| 23.19              | 3.84         | 3                    | 39.94              | 2.26         | 2                    |

**Table S13.** Experimental powder diffraction data for **phbigua<sub>2</sub>SO<sub>4</sub>**.

| <b>2 Theta (°)</b> | <b>d (Å)</b> | <b>Intensity (%)</b> | <b>2 Theta (°)</b> | <b>d (Å)</b> | <b>Intensity (%)</b> |
|--------------------|--------------|----------------------|--------------------|--------------|----------------------|
| 7.77               | 11.37        | 1                    | 26.62              | 3.35         | 9                    |
| 9.45               | 9.35         | 100                  | 27.45              | 3.25         | 2                    |
| 11.48              | 7.71         | 2                    | 28.52              | 3.13         | 12                   |
| 14.79              | 5.99         | 11                   | 28.75              | 3.10         | 13                   |
| 15.99              | 5.54         | 12                   | 29.24              | 3.05         | 7                    |
| 16.72              | 5.30         | 6                    | 29.58              | 3.02         | 11                   |
| 16.78              | 5.28         | 2                    | 30.53              | 2.93         | 1                    |
| 18.04              | 4.91         | 50                   | 32.38              | 2.77         | 3                    |
| 18.99              | 4.67         | 1                    | 34.16              | 2.62         | 1                    |
| 20.27              | 4.38         | 12                   | 34.71              | 2.58         | 1                    |
| 20.40              | 4.35         | 16                   | 38.49              | 2.34         | 2                    |
| 20.98              | 4.23         | 2                    | 39.90              | 2.26         | 1                    |
| 21.75              | 4.08         | 80                   | 42.64              | 2.12         | 2                    |
| 23.01              | 3.86         | 5                    | 43.89              | 2.06         | 1                    |
| 26.16              | 3.41         | 3                    | 45.28              | 2.00         | 1                    |

**Table S14.** Experimental powder diffraction data for **phbigua<sub>2</sub>HPO<sub>4</sub>·1.5H<sub>2</sub>O**.

| <b>2 Theta (°)</b> | <b>d (Å)</b> | <b>Intensity (%)</b> | <b>2 Theta (°)</b> | <b>d (Å)</b> | <b>Intensity (%)</b> |
|--------------------|--------------|----------------------|--------------------|--------------|----------------------|
| 6.72               | 13.14        | 32                   | 19.61              | 4.52         | 23                   |
| 7.38               | 11.97        | 29                   | 21.96              | 4.04         | 47                   |
| 9.58               | 9.22         | 81                   | 22.16              | 4.01         | 27                   |
| 9.66               | 9.15         | 100                  | 22.82              | 3.89         | 22                   |
| 12.96              | 6.83         | 20                   | 23.42              | 3.80         | 53                   |
| 13.26              | 6.67         | 15                   | 24.43              | 3.64         | 16                   |
| 14.08              | 6.28         | 18                   | 24.87              | 3.58         | 16                   |
| 16.37              | 5.41         | 15                   | 25.32              | 3.51         | 33                   |
| 16.88              | 5.25         | 12                   | 27.59              | 3.23         | 22                   |
| 17.11              | 5.18         | 27                   | 28.48              | 3.13         | 31                   |
| 17.40              | 5.09         | 21                   | 28.83              | 3.09         | 22                   |
| 18.07              | 4.90         | 16                   | 29.13              | 3.06         | 18                   |
| 18.84              | 4.71         | 19                   | 29.34              | 3.04         | 15                   |
| 19.13              | 4.64         | 52                   | 31.84              | 2.81         | 17                   |
| 19.32              | 4.59         | 76                   | 32.03              | 2.79         | 25                   |

**Table S15.** Experimental powder diffraction data for **phbigua<sub>2</sub>HPO<sub>3</sub>**.

| <b>2 Theta (°)</b> | <b>d (Å)</b> | <b>Intensity (%)</b> | <b>2 Theta (°)</b> | <b>d (Å)</b> | <b>Intensity (%)</b> |
|--------------------|--------------|----------------------|--------------------|--------------|----------------------|
| 10.26              | 8.61         | 31                   | 24.43              | 3.64         | 21                   |
| 10.90              | 8.11         | 17                   | 25.22              | 3.53         | 45                   |
| 13.98              | 6.33         | 12                   | 26.65              | 3.34         | 14                   |
| 14.81              | 5.98         | 13                   | 28.05              | 3.18         | 45                   |
| 15.12              | 5.86         | 10                   | 28.33              | 3.15         | 42                   |
| 15.70              | 5.64         | 43                   | 29.50              | 3.03         | 32                   |
| 18.02              | 4.92         | 63                   | 30.65              | 2.92         | 21                   |
| 18.46              | 4.80         | 15                   | 31.63              | 2.83         | 17                   |
| 20.15              | 4.40         | 100                  | 32.10              | 2.79         | 19                   |
| 21.32              | 4.16         | 64                   | 32.58              | 2.75         | 23                   |
| 21.55              | 4.12         | 63                   | 34.13              | 2.62         | 13                   |
| 22.50              | 3.95         | 46                   | 34.75              | 2.58         | 11                   |
| 22.02              | 4.03         | 19                   | 35.43              | 2.53         | 10                   |
| 23.10              | 3.85         | 16                   | 38.09              | 2.36         | 12                   |
| 23.38              | 3.80         | 10                   | 39.57              | 2.28         | 10                   |

**Table S16.** Experimental powder diffraction data for **phbigua<sub>2</sub>HPO<sub>3</sub>·2H<sub>2</sub>O**.

| <b>2 Theta (°)</b> | <b>d (Å)</b> | <b>Intensity (%)</b> | <b>2 Theta (°)</b> | <b>d (Å)</b> | <b>Intensity (%)</b> |
|--------------------|--------------|----------------------|--------------------|--------------|----------------------|
| 7.28               | 12.14        | 12                   | 20.39              | 4.35         | 48                   |
| 7.57               | 11.67        | 17                   | 21.06              | 4.22         | 69                   |
| 9.43               | 9.37         | 28                   | 21.46              | 4.14         | 36                   |
| 10.06              | 8.79         | 41                   | 22.00              | 4.04         | 13                   |
| 10.68              | 8.28         | 25                   | 22.31              | 3.98         | 50                   |
| 13.80              | 6.41         | 20                   | 24.28              | 3.66         | 19                   |
| 14.33              | 6.18         | 12                   | 24.97              | 3.56         | 47                   |
| 14.57              | 6.07         | 17                   | 27.81              | 3.21         | 49                   |
| 15.14              | 5.85         | 19                   | 27.91              | 3.19         | 36                   |
| 15.44              | 5.73         | 59                   | 28.11              | 3.17         | 49                   |
| 17.24              | 5.14         | 14                   | 28.50              | 3.13         | 22                   |
| 17.82              | 4.97         | 82                   | 29.32              | 3.04         | 25                   |
| 19.75              | 4.49         | 43                   | 30.47              | 2.93         | 16                   |
| 19.92              | 4.45         | 100                  | 31.84              | 2.81         | 16                   |
| 20.19              | 4.40         | 46                   | 32.41              | 2.76         | 20                   |
